# Supplementary material for: A Genetic Screen for Functional Partners of Condensin in Fission Yeast
Source: Oxford University Press journal article supplement (doi:10.1534/g3.113.009621), 2013-12-24
Supplement: 009621_figures2.pdf [file 009621_figures2.pdf]

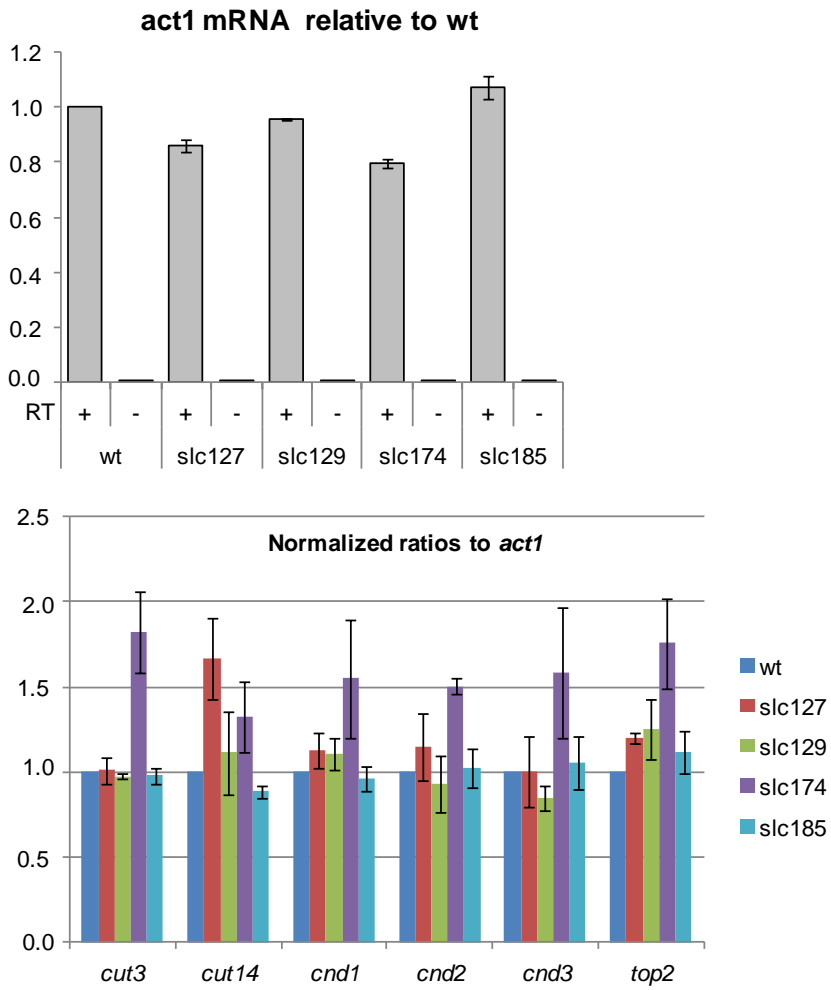

**Figure S2 *slc* mutations do not significantly reduce condensin and top2 steady state mRNA levels.**

Total RNA was extracted from cells exponentially growing at 32°C throughout the experiment. 500 ng of total RNA was reverse-transcribed in the presence (+) or absence (-) of Reverse Transcriptase (RT) and cDNAs were quantified by real time qPCR. Indicated values correspond to average and mean deviation from two independent experiments with two independent reverse transcriptions per experiment.
