# Supplementary material for: A Genetic Screen for Functional Partners of Condensin in Fission Yeast
Source: Oxford University Press journal article supplement (doi:10.1534/g3.113.009621), 2013-12-24
Supplement: 009621_figures6.pdf [file 009621_figures6.pdf]

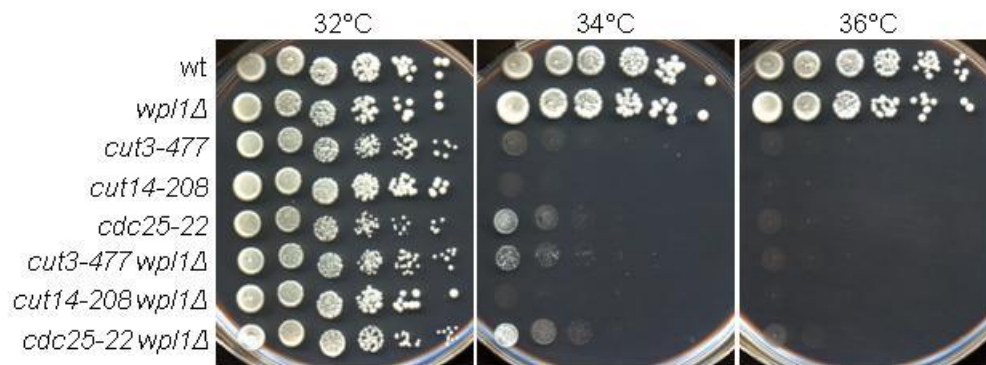

**Figure S6 Lack of Wpl1 does not suppress the thermosensitive growth phenotype of condensin mutants**

Strains of indicated genotypes were serially diluted and spotted onto complete medium. Plates were incubated for 4 days. Thermosensitive *cdc25-22* was used as a specificity control.
