# Supplementary material for: A Genetic Screen for Functional Partners of Condensin in Fission Yeast
Source: Oxford University Press journal article supplement (doi:10.1534/g3.113.009621), 2013-12-24
Supplement: 009621_tables1.pdf [file 009621_tables1.pdf]

**Table S1 Strains used in this study**

| <b>number</b> | <b>genotype</b>                                                     | <b>origin</b> |
|---------------|---------------------------------------------------------------------|---------------|
| <b>LY113</b>  | <i>h- leu1-32 ura4D18 ade6-210</i>                                  | Lab stock     |
| <b>LY45</b>   | <i>h- leu1-32 ura4D18 cut3-477</i>                                  | YGRC          |
| <b>LY270</b>  | <i>h- leu1-32 ura4D18 nda3-KM311</i>                                | Lab stock     |
| <b>LY1802</b> | <i>h- leu1-32 ura4D18 or DS/E nda3-KM311 cnd2-gfp-LEU2</i>          | YGRC          |
| <b>LY2046</b> | <i>h- leu1-32 ura4D18 or DS/E cut3-477 nda3-KM311 cnd2-gfp-LEU2</i> | Lab stock     |
| <b>LY78</b>   | <i>h- leu1-32 cut3-477 pREP41XL-cut3-LEU2</i>                       | Lab stock     |
| <b>LY69</b>   | <i>h- leu1-32 cut3-477 pREP41XL-LEU2</i>                            | Lab stock     |
| <b>LY42</b>   | <i>h- leu1-32 top2-250</i>                                          | YGRC          |
| <b>LY75</b>   | <i>h- leu1-32 cut3-477 top2-250 pREP41XL-cut3-LEU2</i>              | Lab stock     |
| <b>LY1064</b> | <i>h- leu1-32 ura4D18 ade6-210 slc71</i>                            | Lab stock     |
| <b>LY862</b>  | <i>h- leu1-32 ura4D18 ade6-210 slc85</i>                            | Lab stock     |
| <b>LY646</b>  | <i>h- leu1-32 ura4D18 or DS/E slc90</i>                             | Lab stock     |
| <b>LY1241</b> | <i>h+ leu1-32 ura4D18 or DS/E ade6-210 slc127</i>                   | Lab stock     |
| <b>LY962</b>  | <i>h- leu1-32 ura4D18 or DS/E ade6-216 slc129</i>                   | Lab stock     |
| <b>LY858</b>  | <i>h- leu1-32 ura4D18 or DS/E ade6-216 slc173</i>                   | Lab stock     |
| <b>LY1259</b> | <i>h+ leu1-32 ade6-210 slc174</i>                                   | Lab stock     |
| <b>LY1261</b> | <i>h+ leu1-32 ura4D18 or DS/E ade6-210 slc175</i>                   | Lab stock     |
| <b>LY1250</b> | <i>h- leu1-32 ura4D18 or DS/E ade6-210 slc179</i>                   | Lab stock     |
| <b>LY1252</b> | <i>h- leu1-32 ura4D18 or DS/E ade6-210 slc180</i>                   | Lab stock     |
| <b>LY1264</b> | <i>h- leu1-32 ura4D18 or DS/E ade6-210 slc181</i>                   | Lab stock     |
| <b>LY1266</b> | <i>h- leu1-32 ura4D18 or DS/E ade6-210 slc182</i>                   | Lab stock     |
| <b>LY1268</b> | <i>h- leu1-32 ura4D18 or DS/E ade6-210 slc184</i>                   | Lab stock     |
| <b>LY1269</b> | <i>h- leu1-32 ura4D18 or DS/E ade6-210 slc185</i>                   | Lab stock     |
| <b>LY1271</b> | <i>h- leu1-32 ade6-210 slc190</i>                                   | Lab stock     |
| <b>LY904</b>  | <i>h- leu1-32 ura4D18 or DS/E ade6-216 cut3-477 sup122</i>          | Lab stock     |
| <b>LY480</b>  | <i>h- ura4D18 rad3Δ::ura4+</i>                                      | YGRC          |
| <b>LY28</b>   | <i>h- leu1-32 ura4D18 ade6-210 pcs1Δ::ura4+</i>                     | JP Javerzat   |
| <b>LY2625</b> | <i>h+ leu1-32 ura4D18 ade6-210 arp9Δ::NatR</i>                      | Lab stock     |
| <b>LY2601</b> | <i>h+ leu1-32 ura4D18 ade6-216 cph2Δ::NatR</i>                      | Lab stock     |
| <b>LY2602</b> | <i>h+ leu1-32 ura4D18 ade6-216 ulp2Δ::NatR</i>                      | Lab stock     |
| <b>LY2626</b> | <i>h+ leu1-32 ura4D18 ade6-216 nut2Δ::NatR</i>                      | Lab stock     |
| <b>LY1948</b> | <i>h- leu1-32 ura4D18 ade6-210 alp13Δ::NatR</i>                     | Lab stock     |
| <b>LY662</b>  | <i>h+ leu1-32 ura4D18 wpl1Δ::kanR</i>                               | JP Javerzat   |
