# Supplementary material for: A Genetic Screen for Functional Partners of Condensin in Fission Yeast
Source: PubMed Central journal article supplement (PMC3931570; doi:10.1534/g3.113.009621), 2013-12-20
Supplement: supp_g3.113.009621_009621SI.pdf [file supp_g3.113.009621_009621SI.pdf]

## A genetic screen for functional partners of condensin in fission yeast

Xavier Robellet\*<sup>1,2</sup>, Lydia Fauque\*<sup>1</sup>, Pénélope Legros\*, Esther Mollereau\*, Stéphane Janczarski\*, Morgane Thevenin\*, Hugues Parrinello<sup>§</sup>, Jean-Pierre Desvignes<sup>§ 3</sup> and Pascal Bernard\*<sup>4</sup>

\* LBMC, CNRS UMR 5239, Ecole Normale Supérieure de Lyon, Université Claude Bernard Lyon 1, Lyon, France, F-69364. §

MGX-Montpellier GenomiX, Institut de Genomique Fonctionnelle, Montpellier, France, F-34094

1. Equal contribution.
2. Present address: IRIC, Université de Montréal. Montréal, CANADA, H3C 3J7.
3. Present address: U910 INSERM; Faculté de Médecine secteur Timone; Marseille, France
4. Corresponding author

**DOI: 10.1534/g3.113.009621**

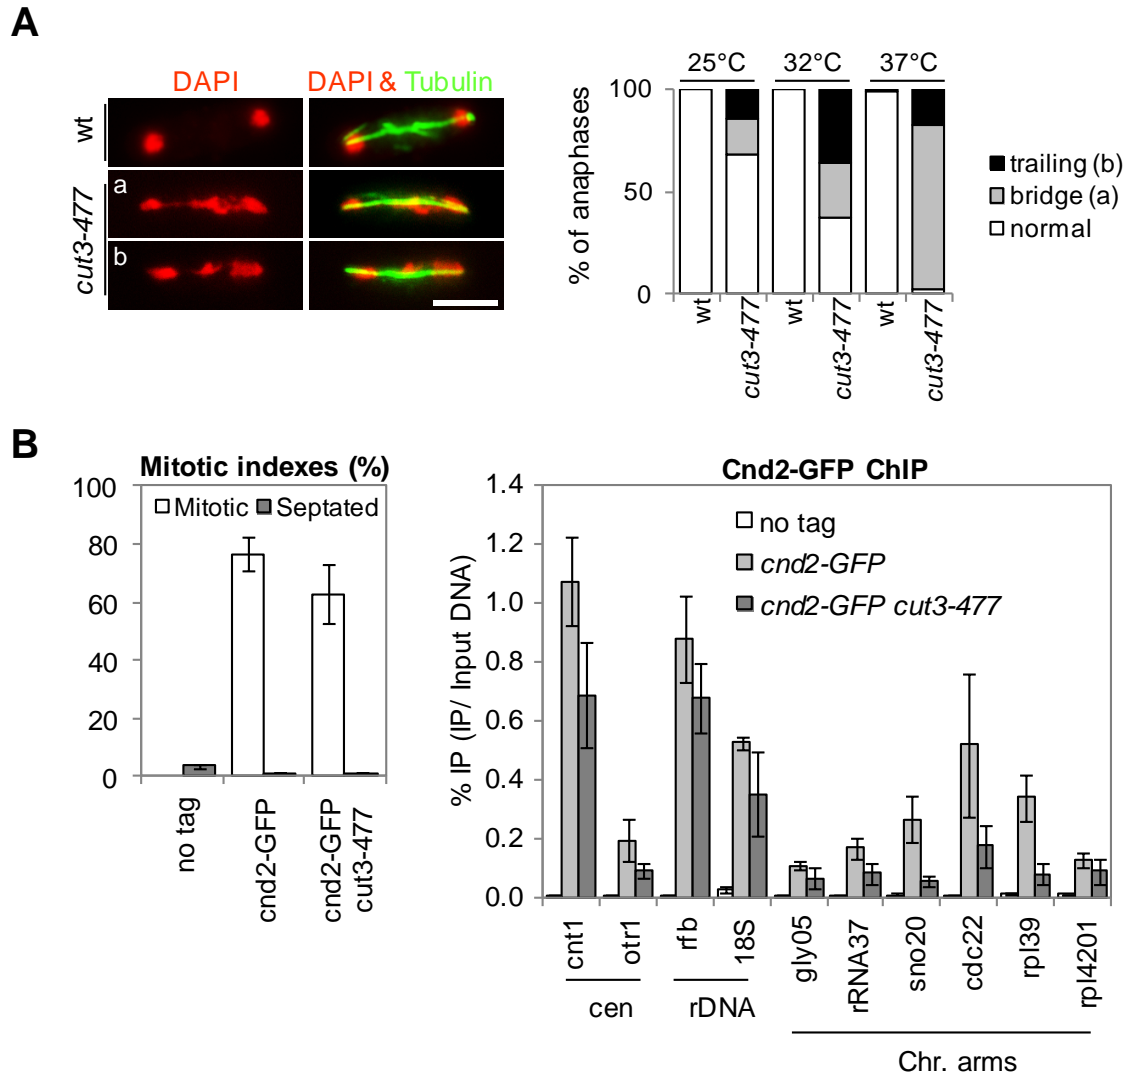

**Figure S1 Characterization of the thermosensitive *cut3-477* condensin mutant**

**A.** Cells grown at 25°C, 32°C or shifted from 25°C to 37°C and further incubated for 2 hours were fixed and processed for immunofluorescence against  $\alpha$ -tubulin (Tubulin). DNA was stained with 4', 6'-diamidino-2-phenylindole (DAPI). Two representative *cut3-477* mutant cells exhibiting chromatin bridge (a) or trailing chromatin (b) are shown. Bar: 5  $\mu$ m. Frequencies were determined by scoring at least 100 anaphase cells (mitotic spindle > 5  $\mu$ m). **B.** Indicated strain were arrested in prometaphase at 17°C by using the *nda3-KM311* mutation and processed for ChIP against GFP. % IP correspond to the average and mean deviation obtained from 3 independent ChIPs. Mitotic arrests were assessed by scoring cells exhibiting nuclear Cnd2-GFP signals (Mitotic) and septated cells (Septated). Average and mean deviation calculated from three independent cultures are indicated.

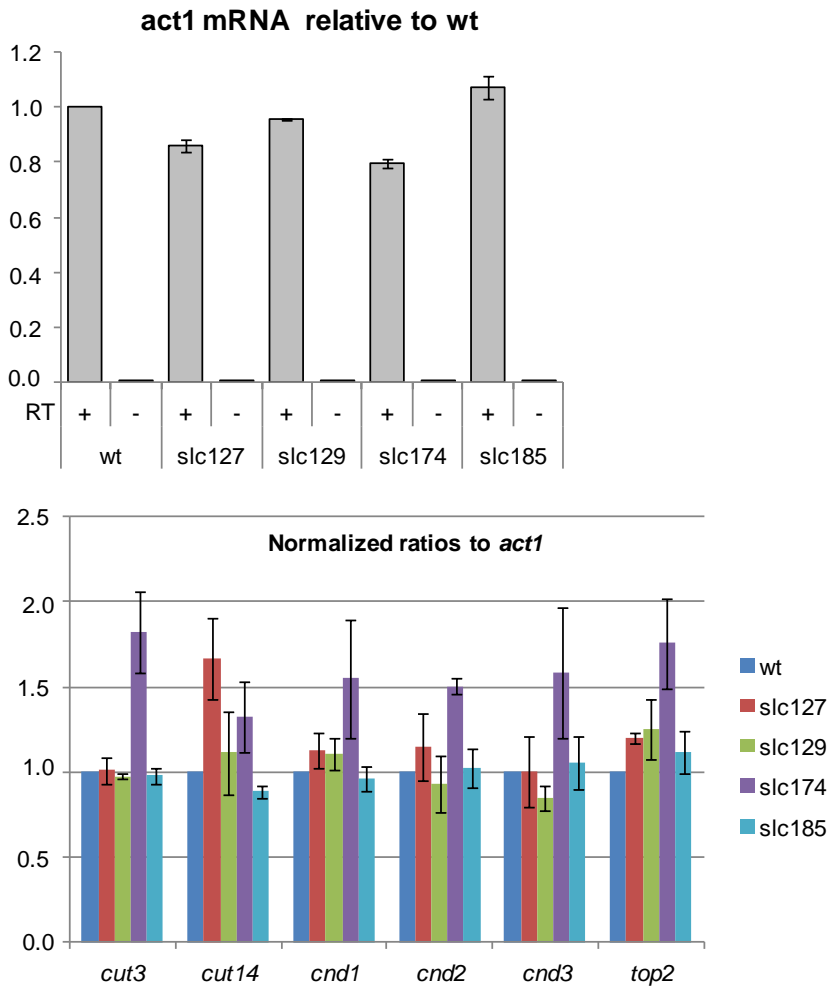

**Figure S2 *slc* mutations do not significantly reduce condensin and top2 steady state mRNA levels.**

Total RNA was extracted from cells exponentially growing at 32°C throughout the experiment. 500 ng of total RNA was reverse-transcribed in the presence (+) or absence (-) of Reverse Transcriptase (RT) and cDNAs were quantified by real time qPCR. Indicated values correspond to average and mean deviation from two independent experiments with two independent reverse transcriptions per experiment.

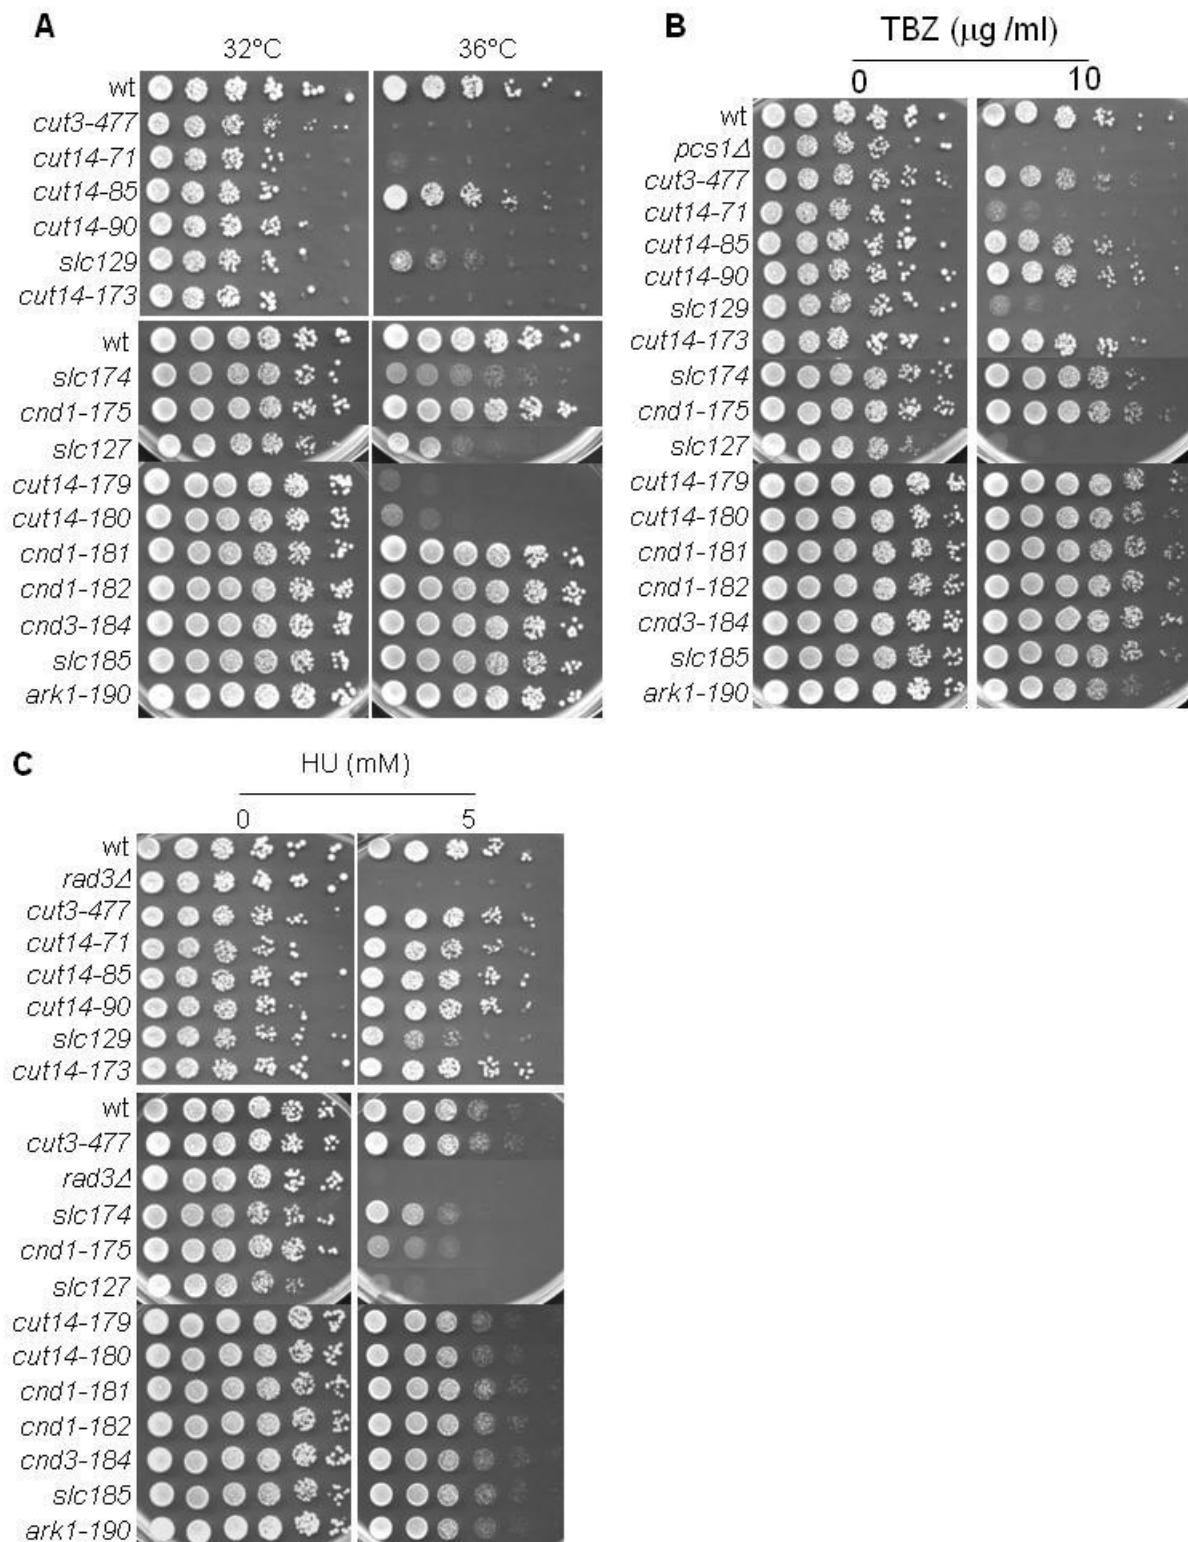

**Figure S3 Macroscopic phenotypes of *slc* mutants**

Strains of indicated genotypes were serially diluted and spotted onto indicated YES+A media. Growth in the presence of TBZ or HU was assessed at 32°C.

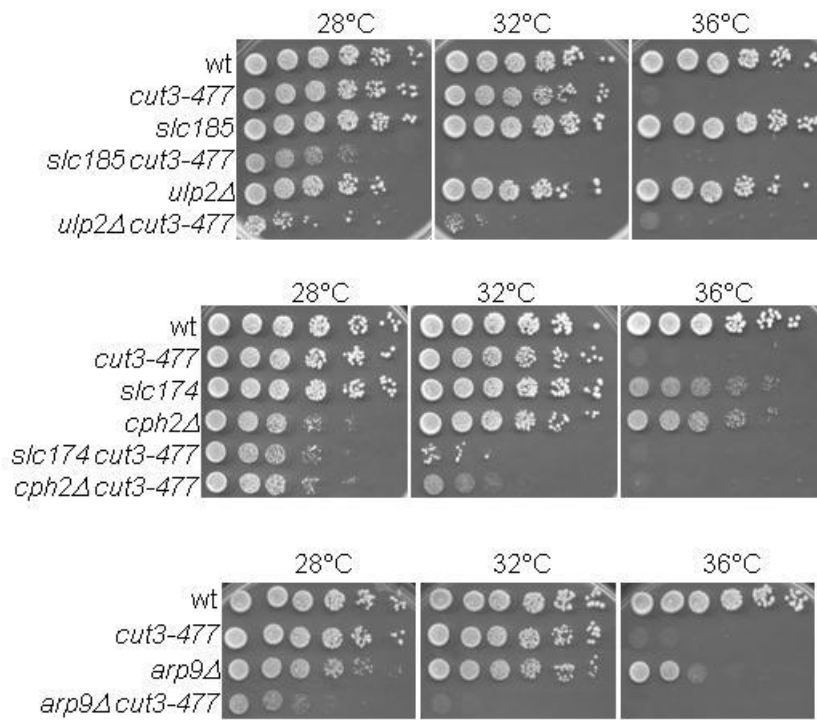

**Figure S4 Negative genetic interaction between *ulp2*, *cph2* or *arp9* and *cut3***  
 Strains of indicated genotypes were serially diluted and spotted onto complete YES+A medium.

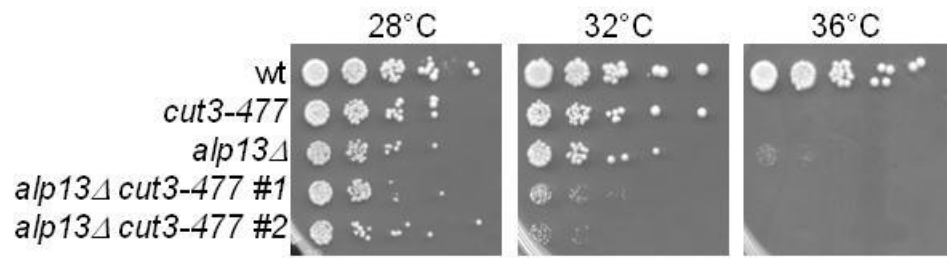

**Figure S5** *cut3-477* confers hypersensitivity to the lack of *alp13*

Strains of indicated genotypes were serially diluted and spotted on complete medium

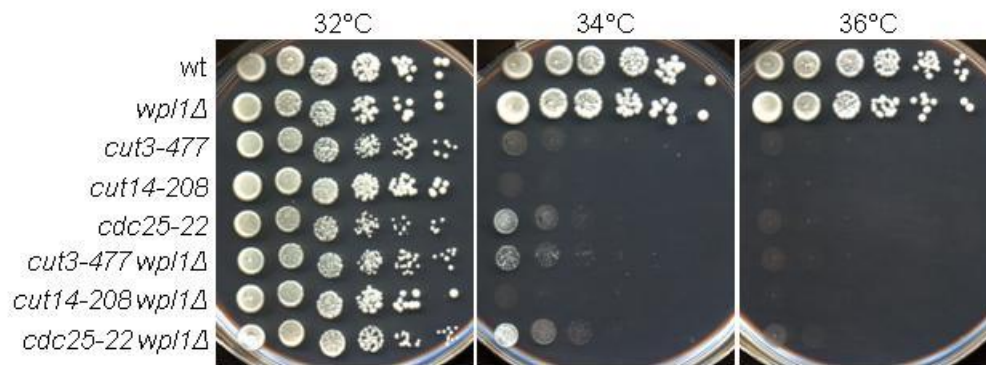

**Figure S6 Lack of Wpl1 does not suppress the thermosensitive growth phenotype of condensin mutants**

Strains of indicated genotypes were serially diluted and spotted onto complete medium. Plates were incubated for 4 days. Thermosensitive *cdc25-22* was used as a specificity control.

#### Files S1-S4

Available for download as Excel files at <http://www.g3journal.org/lookup/suppl/doi:10.1534/g3.113.009621/-/DC1>

**File S1** Raw data sequencing *slc129*

**File S2** Raw data sequencing *slc174*

**File S3** Raw data sequencing *slc185*

**File S4** Raw data sequencing *sup122*



**Table S1 Strains used in this study**

| <b>number</b> | <b>genotype</b>                                                     | <b>origin</b> |
|---------------|---------------------------------------------------------------------|---------------|
| <b>LY113</b>  | <i>h- leu1-32 ura4D18 ade6-210</i>                                  | Lab stock     |
| <b>LY45</b>   | <i>h- leu1-32 ura4D18 cut3-477</i>                                  | YGRC          |
| <b>LY270</b>  | <i>h- leu1-32 ura4D18 nda3-KM311</i>                                | Lab stock     |
| <b>LY1802</b> | <i>h- leu1-32 ura4D18 or DS/E nda3-KM311 cnd2-gfp-LEU2</i>          | YGRC          |
| <b>LY2046</b> | <i>h- leu1-32 ura4D18 or DS/E cut3-477 nda3-KM311 cnd2-gfp-LEU2</i> | Lab stock     |
| <b>LY78</b>   | <i>h- leu1-32 cut3-477 pREP41XL-cut3-LEU2</i>                       | Lab stock     |
| <b>LY69</b>   | <i>h- leu1-32 cut3-477 pREP41XL-LEU2</i>                            | Lab stock     |
| <b>LY42</b>   | <i>h- leu1-32 top2-250</i>                                          | YGRC          |
| <b>LY75</b>   | <i>h- leu1-32 cut3-477 top2-250 pREP41XL-cut3-LEU2</i>              | Lab stock     |
| <b>LY1064</b> | <i>h- leu1-32 ura4D18 ade6-210 slc71</i>                            | Lab stock     |
| <b>LY862</b>  | <i>h- leu1-32 ura4D18 ade6-210 slc85</i>                            | Lab stock     |
| <b>LY646</b>  | <i>h- leu1-32 ura4D18 or DS/E slc90</i>                             | Lab stock     |
| <b>LY1241</b> | <i>h+ leu1-32 ura4D18 or DS/E ade6-210 slc127</i>                   | Lab stock     |
| <b>LY962</b>  | <i>h- leu1-32 ura4D18 or DS/E ade6-216 slc129</i>                   | Lab stock     |
| <b>LY858</b>  | <i>h- leu1-32 ura4D18 or DS/E ade6-216 slc173</i>                   | Lab stock     |
| <b>LY1259</b> | <i>h+ leu1-32 ade6-210 slc174</i>                                   | Lab stock     |
| <b>LY1261</b> | <i>h+ leu1-32 ura4D18 or DS/E ade6-210 slc175</i>                   | Lab stock     |
| <b>LY1250</b> | <i>h- leu1-32 ura4D18 or DS/E ade6-210 slc179</i>                   | Lab stock     |
| <b>LY1252</b> | <i>h- leu1-32 ura4D18 or DS/E ade6-210 slc180</i>                   | Lab stock     |
| <b>LY1264</b> | <i>h- leu1-32 ura4D18 or DS/E ade6-210 slc181</i>                   | Lab stock     |
| <b>LY1266</b> | <i>h- leu1-32 ura4D18 or DS/E ade6-210 slc182</i>                   | Lab stock     |
| <b>LY1268</b> | <i>h- leu1-32 ura4D18 or DS/E ade6-210 slc184</i>                   | Lab stock     |
| <b>LY1269</b> | <i>h- leu1-32 ura4D18 or DS/E ade6-210 slc185</i>                   | Lab stock     |
| <b>LY1271</b> | <i>h- leu1-32 ade6-210 slc190</i>                                   | Lab stock     |
| <b>LY904</b>  | <i>h- leu1-32 ura4D18 or DS/E ade6-216 cut3-477 sup122</i>          | Lab stock     |
| <b>LY480</b>  | <i>h- ura4D18 rad3Δ::ura4+</i>                                      | YGRC          |
| <b>LY28</b>   | <i>h- leu1-32 ura4D18 ade6-210 pcs1Δ::ura4+</i>                     | JP Javerzat   |
| <b>LY2625</b> | <i>h+ leu1-32 ura4D18 ade6-210 arp9Δ::NatR</i>                      | Lab stock     |
| <b>LY2601</b> | <i>h+ leu1-32 ura4D18 ade6-216 cph2Δ::NatR</i>                      | Lab stock     |
| <b>LY2602</b> | <i>h+ leu1-32 ura4D18 ade6-216 ulp2Δ::NatR</i>                      | Lab stock     |
| <b>LY2626</b> | <i>h+ leu1-32 ura4D18 ade6-216 nut2Δ::NatR</i>                      | Lab stock     |
| <b>LY1948</b> | <i>h- leu1-32 ura4D18 ade6-210 alp13Δ::NatR</i>                     | Lab stock     |
| <b>LY662</b>  | <i>h+ leu1-32 ura4D18 wpl1Δ::kanR</i>                               | JP Javerzat   |
