# Supplementary material for: A Genetic Screen for Functional Partners of Condensin in Fission Yeast
Source: PubMed Central journal article supplement (PMC3931570; doi:10.1534/g3.113.009621), 2013-12-20
Supplement: supp_g3.113.009621_FigureS3.pdf [file supp_g3.113.009621_FigureS3.pdf]

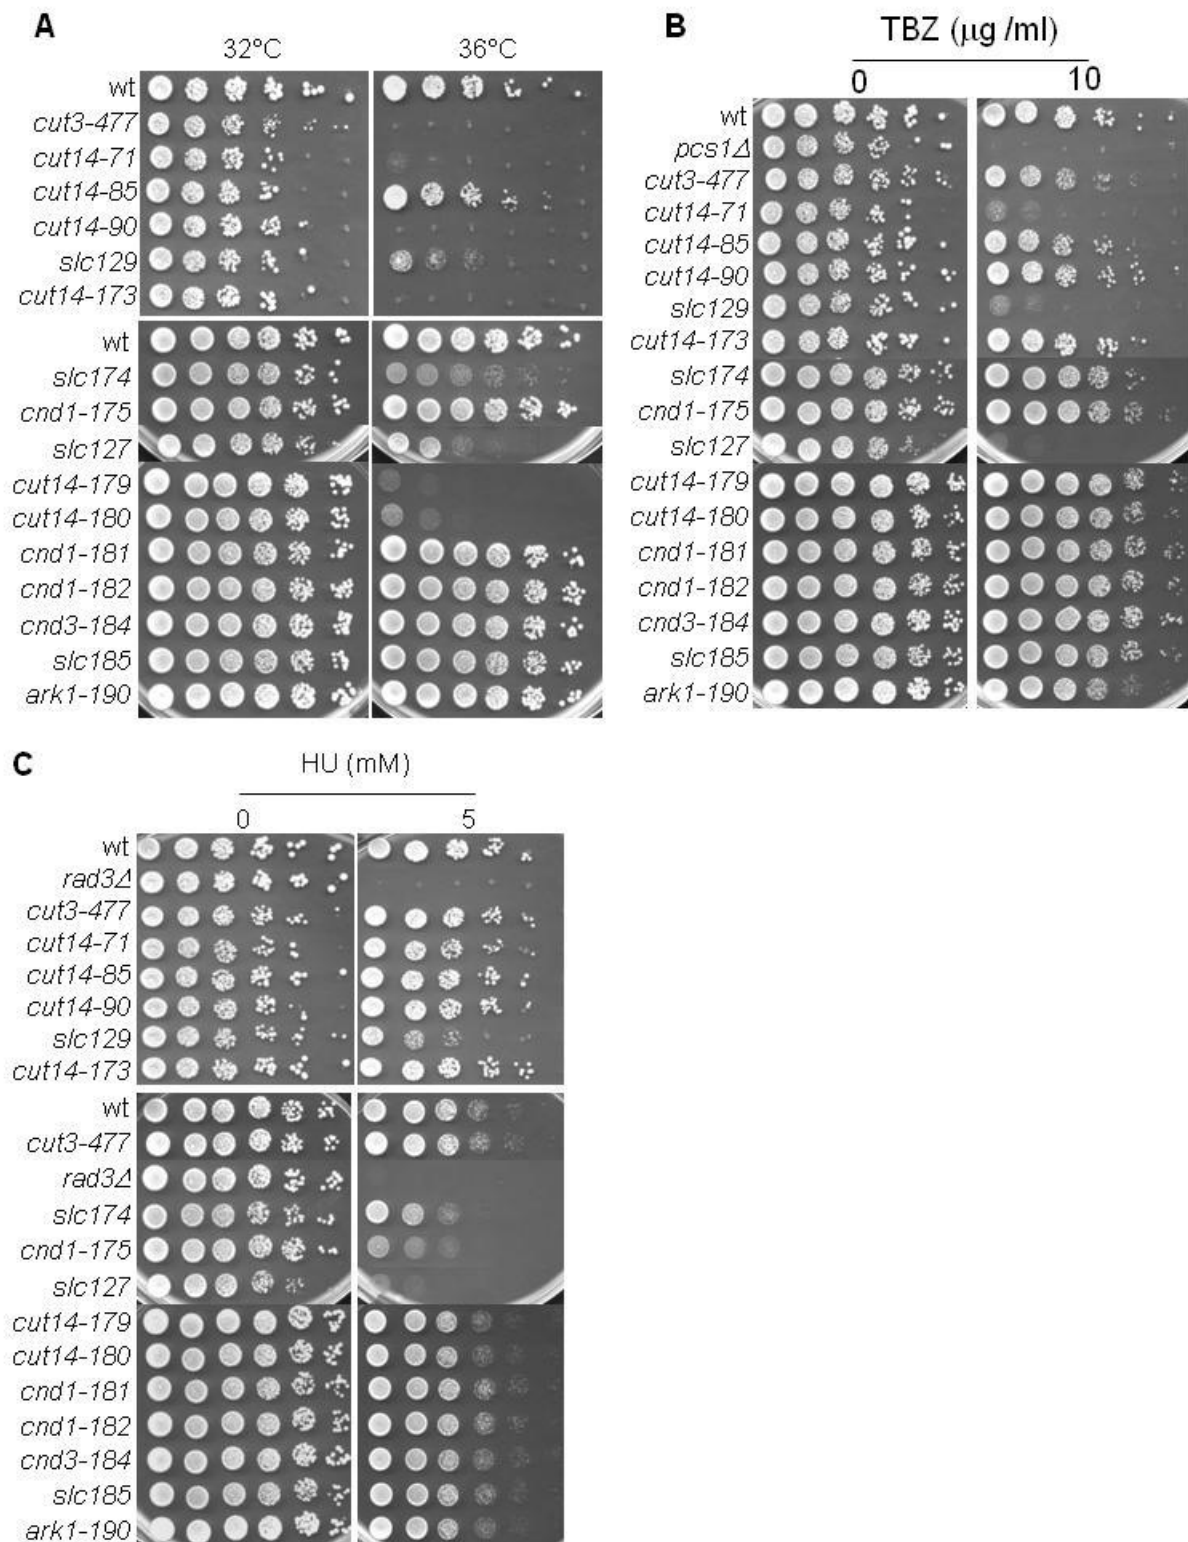

**Figure S3 Macroscopic phenotypes of *slc* mutants**

Strains of indicated genotypes were serially diluted and spotted onto indicated YES+A media. Growth in the presence of TBZ or HU was assessed at 32°C.
