# Supplementary material for: A Genetic Screen for Functional Partners of Condensin in Fission Yeast
Source: PubMed Central journal article supplement (PMC3931570; doi:10.1534/g3.113.009621), 2013-12-20
Supplement: supp_g3.113.009621_FigureS4.pdf [file supp_g3.113.009621_FigureS4.pdf]

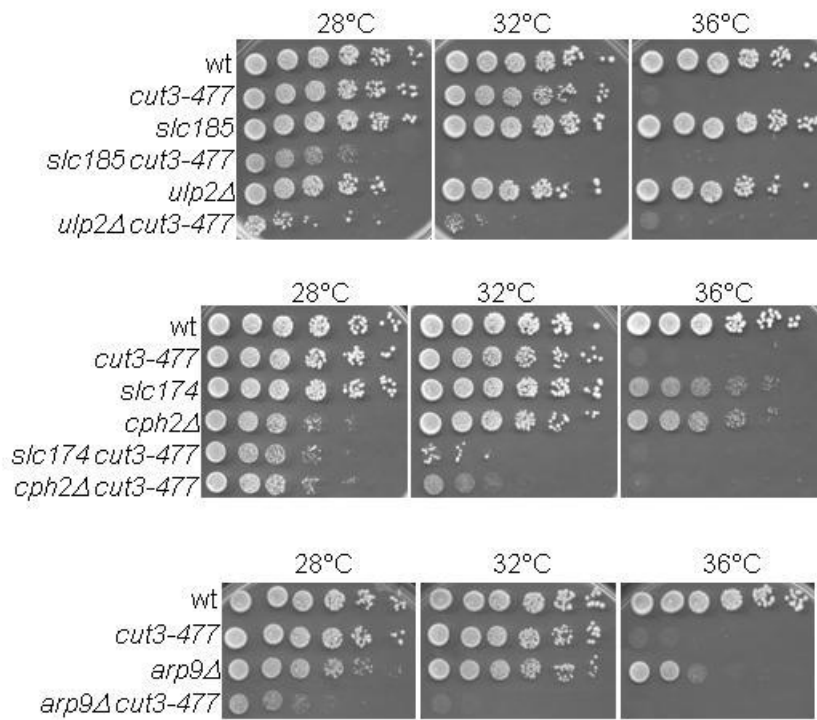

**Figure S4 Negative genetic interaction between *ulp2*, *cph2* or *arp9* and *cut3***  
 Strains of indicated genotypes were serially diluted and spotted onto complete YES+A medium.
