# Supplementary material for: A Genetic Screen for Functional Partners of Condensin in Fission Yeast
Source: PubMed Central journal article supplement (PMC3931570; doi:10.1534/g3.113.009621), 2013-12-20
Supplement: supp_g3.113.009621_FigureS5.pdf [file supp_g3.113.009621_FigureS5.pdf]

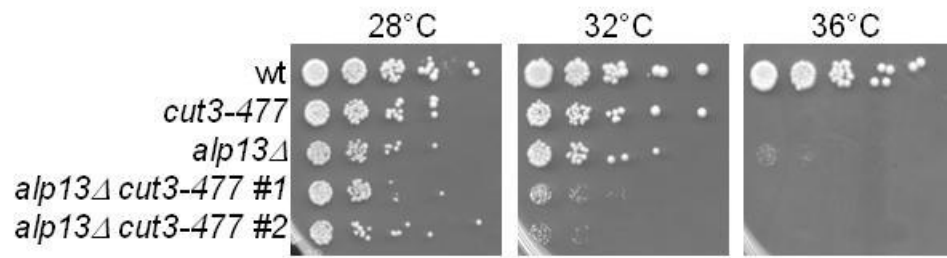

**Figure S5** *cut3-477* confers hypersensitivity to the lack of *alp13*

Strains of indicated genotypes were serially diluted and spotted on complete medium
