# Supplementary material for: A Genetic Screen for Functional Partners of Condensin in Fission Yeast
Source: G3 (Bethesda). 2013 Dec 20;4(2):373–81. doi: 10.1534/g3.113.009621 (PMC3931570; doi:10.1534/g3.113.009621)
Supplement: Supporting Information [file supp_g3.113.009621_FileS1.xlsx]

## Sheet: chr1
# ** CASAVA depth-filtered snp calls **
#$ CMDLINE /usr/local/libexec/CASAVA-1.8.0/filterSmallVariants.pl --projectDir=/data2/110630_SN187_0202_AB09BJABXX_Bernard_Lequere/Aligned/Project_gDNA_Bernard/Sample_LY960/SNP --chrom=ChrI.fa
#$ SEQ_MAX_DEPTH ChrI.fa 618.35819970952
#
#$ COLUMNS seq_name pos bcalls_used bcalls_filt ref Q(snp) max_gt Q(max_gt) max_gt|poly_site Q(max_gt|poly_site) A_used C_used G_used T_used
ChrI.fa	18475	332	1	C	1005	CT	869	CT	869	0	159	0	173
ChrI.fa	27414	19	16	C	33	AC	33	AC	66	7	12	0	0
ChrI.fa	43372	10	16	T	1	TT	9	AT	24	3	0	0	7
ChrI.fa	68502	126	8	A	2	AA	5	AC	29	76	50	0	0
ChrI.fa	101873	31	11	C	214	CG	63	CG	63	0	7	24	0
ChrI.fa	101874	29	10	A	116	AC	105	AC	106	10	19	0	0
ChrI.fa	180361	198	3	A	25	AC	25	AC	58	114	84	0	0
ChrI.fa	216517	91	14	A	32	AC	32	AC	65	58	33	0	0
ChrI.fa	318371	86	7	A	4	AC	4	AC	35	51	35	0	0
ChrI.fa	427502	53	10	T	11	CT	11	CT	43	0	12	0	41
ChrI.fa	427504	62	10	C	204	CT	204	CT	237	0	33	0	29
ChrI.fa	470380	26	22	C	323	GG	73	GG	73	0	0	26	0
ChrI.fa	470381	25	22	G	299	TT	68	TT	68	0	0	1	24
ChrI.fa	470389	11	24	A	155	GG	30	GG	30	0	0	11	0
ChrI.fa	470391	42	24	C	542	AA	121	AA	121	42	0	0	0
ChrI.fa	523603	259	0	G	3070	AA	774	AA	774	259	0	0	0
ChrI.fa	523883	136	0	G	1688	AA	406	AA	406	136	0	0	0
ChrI.fa	527156	338	1	C	3070	AA	1012	AA	1012	338	0	0	0
ChrI.fa	670032	48	26	C	23	AC	23	AC	56	10	37	1	0
ChrI.fa	670034	40	26	C	105	AC	105	AC	138	16	24	0	0
ChrI.fa	670036	41	26	T	12	CT	12	CT	45	1	8	0	32
ChrI.fa	682994	40	9	C	20	CT	20	CT	53	0	30	0	10
ChrI.fa	682997	36	9	C	33	CG	33	CG	66	0	27	9	0
ChrI.fa	759334	169	1	G	2124	TT	506	TT	505	0	0	0	169
ChrI.fa	862962	16	17	C	16	CT	16	CT	49	0	13	0	3
ChrI.fa	862964	16	17	G	236	TT	45	TT	45	0	0	0	16
ChrI.fa	862965	16	17	A	16	AT	16	AT	49	12	0	1	3
ChrI.fa	1274803	112	21	T	334	AT	334	AT	367	53	0	0	59
ChrI.fa	1274805	109	21	T	50	AT	50	AT	83	29	0	0	80
ChrI.fa	1274806	108	21	A	2	AA	5	AT	30	82	1	0	25
ChrI.fa	1291914	66	5	C	1	CC	6	CT	28	0	43	0	23
ChrI.fa	1424707	38	13	C	12	AC	12	AC	45	8	30	0	0
ChrI.fa	1424709	57	13	A	620	CT	204	CT	207	0	31	0	26
ChrI.fa	1664907	208	1	T	2587	AA	607	AA	604	207	0	1	0
ChrI.fa	1732425	47	7	C	2	CC	5	CG	30	0	34	12	1
ChrI.fa	1783458	184	0	C	2308	TT	551	TT	551	0	0	0	184
ChrI.fa	1812280	106	7	A	1	AA	9	AC	24	75	31	0	0
ChrI.fa	1936294	87	27	G	6	AG	6	AG	37	18	0	69	0
ChrI.fa	1936299	67	27	G	8	AG	8	AG	41	14	0	53	0
ChrI.fa	1999192	149	0	G	1873	CC	445	CC	445	0	149	0	0
ChrI.fa	2093954	269	0	A	3070	GG	802	GG	802	0	0	269	0
ChrI.fa	2104091	273	2	G	3070	TT	817	TT	817	0	0	0	273
ChrI.fa	2104097	269	1	C	3070	AA	805	AA	805	269	0	0	0
ChrI.fa	2154491	45	8	T	38	AT	38	AT	71	10	0	0	35
ChrI.fa	2154493	34	8	G	118	AG	118	AG	151	15	0	19	0
ChrI.fa	2154494	38	8	T	92	GT	92	GT	125	0	0	14	24
ChrI.fa	2421577	124	23	C	576	AC	272	AC	272	76	48	0	0
ChrI.fa	2421578	117	23	C	142	CG	142	CG	175	0	79	38	0
ChrI.fa	2506044	188	0	T	2347	AA	563	AA	563	188	0	0	0
ChrI.fa	2507461	65	22	A	88	AT	88	AT	121	43	0	0	22
ChrI.fa	2507462	64	22	T	173	AT	173	AT	206	29	0	0	35
ChrI.fa	2523704	144	6	A	82	AC	82	AC	115	83	61	0	0
ChrI.fa	2588020	91	9	A	183	AC	183	AC	216	56	35	0	0
ChrI.fa	2588021	95	9	C	241	AC	241	AC	274	41	54	0	0
ChrI.fa	2588025	87	9	G	1	GG	8	AG	26	18	0	69	0
ChrI.fa	2588073	73	4	T	183	AT	183	AT	216	29	0	0	44
ChrI.fa	2594263	44	4	C	17	CT	17	CT	50	0	35	0	9
ChrI.fa	2594265	59	4	A	185	AT	185	AT	218	31	0	0	28
ChrI.fa	2594266	47	4	G	45	AG	45	AG	78	15	0	32	0
ChrI.fa	2594327	26	3	C	350	AA	75	AA	75	26	0	0	0
ChrI.fa	2594328	8	3	A	125	CC	21	CC	21	0	8	0	0
ChrI.fa	2594350	9	5	A	142	TT	24	TT	24	0	0	0	9
ChrI.fa	2594351	16	5	T	238	AA	45	AA	45	16	0	0	0
ChrI.fa	2605764	265	5	T	3070	AA	791	AA	791	264	0	1	0
ChrI.fa	2605861	55	11	T	20	GT	20	GT	53	0	0	13	42
ChrI.fa	2605863	67	11	T	165	AT	165	AT	198	28	0	0	39
ChrI.fa	2605864	67	11	A	99	AC	99	AC	132	45	22	0	0
ChrI.fa	2607669	85	15	A	69	AT	69	AT	102	61	0	0	24
ChrI.fa	2607674	112	15	G	29	GT	29	GT	62	0	0	86	26
ChrI.fa	2643596	251	0	C	2983	AA	752	AA	752	251	0	0	0
ChrI.fa	2683903	22	7	C	36	CT	36	CT	69	0	17	0	5
ChrI.fa	2683904	29	7	C	147	AC	146	AC	152	16	13	0	0
ChrI.fa	2747078	384	1	A	3070	GG	1153	GG	1153	0	0	384	0
ChrI.fa	2759871	49	5	T	263	CT	150	CT	150	0	31	0	18
ChrI.fa	2759873	53	5	T	9	CT	9	CT	41	0	10	0	43
ChrI.fa	2824260	174	0	C	2191	AA	519	AA	519	174	0	0	0
ChrI.fa	2874305	304	3	G	3070	AA	912	AA	912	304	0	0	0
ChrI.fa	2958950	147	16	A	381	AG	381	AG	414	78	0	69	0
ChrI.fa	2976150	197	13	G	57	GT	57	GT	90	0	0	124	73
ChrI.fa	3111508	170	0	A	2121	GG	509	GG	509	0	0	170	0
ChrI.fa	3115841	184	0	C	2214	AA	551	AA	551	184	0	0	0
ChrI.fa	3119299	302	0	G	3070	AA	884	AA	884	300	0	1	1
ChrI.fa	3125118	42	18	A	4	AT	4	AT	34	34	0	0	8
ChrI.fa	3125120	41	18	A	214	AT	150	AT	150	16	0	0	25
ChrI.fa	3125121	35	18	T	144	AT	144	AT	175	18	0	0	17
ChrI.fa	3178493	37	8	T	7	CT	7	CT	38	0	7	0	30
ChrI.fa	3178494	39	8	C	83	CT	83	CT	116	0	26	0	13
ChrI.fa	3178497	48	8	C	86	CT	86	CT	119	0	33	0	15
ChrI.fa	3179238	259	0	G	3070	CC	767	CC	764	1	258	0	0
ChrI.fa	3197528	26	12	A	26	AG	26	AG	59	21	0	5	0
ChrI.fa	3197531	33	13	T	139	GT	139	GT	172	0	0	16	17
ChrI.fa	3197534	31	17	G	68	GT	68	GT	101	0	0	20	11
ChrI.fa	3204845	183	1	G	2271	AA	548	AA	548	183	0	0	0
ChrI.fa	3289534	58	6	G	75	GT	75	GT	108	0	1	19	38
ChrI.fa	3338079	32	3	C	1	CC	8	CG	25	0	18	14	0
ChrI.fa	3340836	174	1	C	2139	TT	521	TT	521	0	0	0	174
ChrI.fa	3340941	196	2	C	2363	TT	544	TT	544	0	1	0	195
ChrI.fa	3358042	37	7	G	4	CG	4	CG	34	0	12	25	0
ChrI.fa	3371618	152	1	A	1894	GG	452	GG	452	0	0	152	0
ChrI.fa	3391542	273	0	T	3070	CC	773	CC	773	0	272	0	1
ChrI.fa	3450128	22	10	G	3	GG	3	CG	32	0	3	19	0
ChrI.fa	3450131	36	10	T	429	AG	64	AG	67	10	0	26	0
ChrI.fa	3460317	45	11	A	1	AA	7	AT	27	37	0	0	8
ChrI.fa	3460318	42	11	T	41	CT	41	CT	74	0	11	0	31
ChrI.fa	3460321	43	11	T	157	CT	157	CT	190	0	21	0	22
ChrI.fa	3460322	46	11	G	125	GT	125	GT	158	0	0	27	19
ChrI.fa	3538416	16	2	C	230	TT	45	TT	45	0	0	0	16
ChrI.fa	3538417	13	2	G	164	CC	36	CC	36	0	13	0	0
ChrI.fa	3538454	8	10	T	121	AA	21	AA	21	8	0	0	0
ChrI.fa	3538456	19	10	A	262	TT	54	TT	54	0	0	0	19
ChrI.fa	3548913	327	17	T	3070	AA	963	AA	963	325	0	0	2
ChrI.fa	3576756	243	0	T	862	CT	752	CT	752	1	127	0	115
ChrI.fa	3583106	343	1	G	3070	AA	1029	AA	1029	343	0	0	0
ChrI.fa	3665610	25	4	G	9	CG	9	CG	42	0	4	21	0
ChrI.fa	3665611	18	4	T	105	CT	105	CT	134	0	9	0	9
ChrI.fa	3665614	22	4	C	14	CT	14	CT	46	0	18	0	4
ChrI.fa	3730378	96	12	A	3	AA	4	AT	32	75	0	0	21
ChrI.fa	3783047	1	0	A	11	AG	3	AG	3	0	0	1	0
ChrI.fa	3869562	156	18	G	81	GT	81	GT	114	0	0	91	65
ChrI.fa	3992214	182	17	C	2122	AA	534	AA	534	181	1	0	0
ChrI.fa	4304169	79	14	G	65	AG	65	AG	98	21	0	58	0
ChrI.fa	4359121	107	12	A	39	AC	39	AC	72	67	40	0	0
ChrI.fa	4360520	142	13	T	24	AT	24	AT	57	36	0	0	106
ChrI.fa	4374343	23	4	G	9	AG	9	AG	41	4	0	19	0
ChrI.fa	4374344	21	4	G	196	AG	73	AG	73	16	0	5	0
ChrI.fa	4375421	192	0	A	2430	TT	575	TT	575	0	0	0	192
ChrI.fa	4407494	25	6	T	42	GT	42	GT	75	0	0	7	18
ChrI.fa	4407496	11	6	C	13	CG	13	CG	46	0	9	2	0
ChrI.fa	4407497	15	6	G	5	CG	5	CG	36	1	2	12	0
ChrI.fa	4410191	33	28	C	32	CG	32	CG	65	0	25	8	0
ChrI.fa	4410192	32	28	G	85	CG	85	CG	118	0	12	20	0
ChrI.fa	4410194	42	28	G	95	AG	95	AG	128	15	0	27	0
ChrI.fa	4431860	15	9	T	219	AA	42	AA	42	15	0	0	0
ChrI.fa	4431861	11	9	A	160	TT	30	TT	30	0	0	0	11
ChrI.fa	4431867	10	8	G	151	CC	27	CC	27	0	10	0	0
ChrI.fa	4431868	16	8	C	231	AA	45	AA	45	16	0	0	0
ChrI.fa	4440812	75	4	T	16	GT	16	GT	49	0	0	30	45
ChrI.fa	4441486	35	23	C	32	CG	32	CG	65	0	22	13	0
ChrI.fa	4442714	302	1	G	3070	AA	906	AA	906	302	0	0	0
ChrI.fa	4643634	34	12	T	17	GT	17	GT	50	0	0	6	28
ChrI.fa	4643642	50	12	A	2	AA	5	AG	30	41	0	9	0
ChrI.fa	4648160	132	20	G	1037	TT	203	TT	203	0	0	16	116
ChrI.fa	4650810	308	1	A	3070	CC	882	CC	882	1	306	0	1
ChrI.fa	4766025	139	0	C	1741	TT	415	TT	415	0	0	0	139
ChrI.fa	4919603	344	3	A	3070	GG	1032	GG	1032	0	0	344	0
ChrI.fa	5055031	105	14	A	1	AA	5	AG	29	82	0	23	0
ChrI.fa	5102406	256	2	C	3070	TT	767	TT	767	0	0	0	256
ChrI.fa	5142627	31	19	A	123	AG	123	AG	156	17	0	14	0
ChrI.fa	5142629	37	19	T	102	GT	102	GT	135	0	0	15	22
ChrI.fa	5142630	46	19	A	37	AT	37	AT	70	32	0	0	14
ChrI.fa	5224613	103	53	T	130	CT	130	CT	163	0	36	0	67
ChrI.fa	5224616	106	53	C	321	CT	321	CT	354	0	54	0	52
ChrI.fa	5271466	175	4	A	1396	TT	164	TT	164	30	0	0	145
ChrI.fa	5400080	215	0	C	2671	TT	644	TT	644	0	0	0	215
ChrI.fa	5426636	271	30	C	88	CT	88	CT	121	0	194	0	77
ChrI.fa	5492975	141	11	A	110	AC	110	AC	143	81	60	0	0
ChrI.fa	5559383	62	13	A	22	AT	22	AT	55	35	0	0	27

## Sheet: chr2
# ** CASAVA depth-filtered snp calls **
#$ CMDLINE /usr/local/libexec/CASAVA-1.8.0/filterSmallVariants.pl --projectDir=/data2/110630_SN187_0202_AB09BJABXX_Bernard_Lequere/Aligned/Project_gDNA_Bernard/Sample_LY960/SNP --chrom=ChrII.fa
#$ SEQ_MAX_DEPTH ChrII.fa 626.359139475602
#
#$ COLUMNS seq_name pos bcalls_used bcalls_filt ref Q(snp) max_gt Q(max_gt) max_gt|poly_site Q(max_gt|poly_site) A_used C_used G_used T_used
ChrII.fa	128008	95	9	A	278	AT	278	AT	311	51	0	0	44
ChrII.fa	128009	94	9	T	232	AT	232	AT	265	39	0	0	55
ChrII.fa	146080	61	19	C	44	CT	44	CT	77	0	43	0	18
ChrII.fa	266718	223	0	A	2755	CC	668	CC	668	0	223	0	0
ChrII.fa	266780	227	0	T	2766	AA	680	AA	680	227	0	0	0
ChrII.fa	276539	156	0	A	1906	TT	466	TT	466	0	0	0	156
ChrII.fa	455562	79	4	A	1	AA	6	AC	28	52	27	0	0
ChrII.fa	603280	53	55	T	683	AA	157	AA	156	53	0	0	0
ChrII.fa	603282	14	44	A	200	TT	39	TT	39	0	0	0	14
ChrII.fa	603305	2	20	A	27	CC	5	CC	5	0	2	0	0
ChrII.fa	603306	19	20	C	275	AA	54	AA	54	19	0	0	0
ChrII.fa	685728	226	0	G	2739	AA	623	AA	623	224	0	2	0
ChrII.fa	699951	117	53	T	1454	GG	349	GG	349	0	0	117	0
ChrII.fa	699952	118	53	G	1450	TT	352	TT	352	0	0	0	118
ChrII.fa	699961	79	51	A	998	TT	235	TT	235	0	0	0	79
ChrII.fa	700011	24	5	A	325	CC	69	CC	69	0	24	0	0
ChrII.fa	700012	12	4	C	176	AA	33	AA	33	12	0	0	0
ChrII.fa	700024	14	5	T	199	AA	39	AA	39	14	0	0	0
ChrII.fa	700028	54	5	A	690	TT	159	TT	159	0	0	0	54
ChrII.fa	700113	252	0	A	3070	TT	755	TT	755	0	0	0	252
ChrII.fa	820512	56	4	G	57	AG	57	AG	90	33	0	23	0
ChrII.fa	869806	150	1	G	1882	CC	448	CC	448	0	150	0	0
ChrII.fa	879033	203	0	T	2496	AA	608	AA	608	203	0	0	0
ChrII.fa	888600	37	13	C	56	AC	56	AC	89	12	25	0	0
ChrII.fa	888601	37	13	C	159	CG	152	CG	153	1	16	20	0
ChrII.fa	888602	35	13	G	89	AG	89	AG	122	14	0	21	0
ChrII.fa	903105	29	4	T	44	GT	44	GT	77	0	0	9	20
ChrII.fa	903106	36	4	G	178	GT	153	GT	153	0	0	15	21
ChrII.fa	903107	40	4	G	54	GT	54	GT	87	0	0	29	11
ChrII.fa	915285	92	13	A	30	AC	30	AC	63	66	26	0	0
ChrII.fa	923543	207	0	C	2577	AA	620	AA	620	207	0	0	0
ChrII.fa	943554	208	2	C	2601	AA	623	AA	623	208	0	0	0
ChrII.fa	953201	178	0	A	2223	GG	533	GG	533	0	0	178	0
ChrII.fa	967094	74	10	A	886	GG	211	GG	211	0	0	74	0
ChrII.fa	1003025	394	2	A	1410	AG	1156	AG	1156	183	0	211	0
ChrII.fa	1088167	82	9	T	4	AT	4	AT	35	16	0	0	66
ChrII.fa	1114498	123	0	G	1570	AA	367	AA	367	123	0	0	0
ChrII.fa	1116700	71	2	C	926	TT	211	TT	211	0	0	0	71
ChrII.fa	1155903	297	1	T	3070	AA	891	AA	891	297	0	0	0
ChrII.fa	1159678	243	3	G	2968	CC	726	CC	726	0	243	0	0
ChrII.fa	1159694	229	3	A	2791	TT	686	TT	686	0	0	0	229
ChrII.fa	1163155	58	25	T	309	AT	151	AT	151	36	0	0	22
ChrII.fa	1163156	63	25	T	4	AT	4	AT	35	13	0	0	50
ChrII.fa	1238931	265	0	G	3070	AA	794	AA	794	265	0	0	0
ChrII.fa	1308619	50	5	T	75	GT	75	GT	108	0	0	14	36
ChrII.fa	1422317	225	0	T	2801	AA	674	AA	674	225	0	0	0
ChrII.fa	1553976	376	0	A	3070	TT	1127	TT	1127	0	0	0	376
ChrII.fa	1555935	405	0	C	1550	AC	1093	AC	1093	223	182	0	0
ChrII.fa	1598025	10	0	T	2	TT	4	GT	31	0	0	2	8
ChrII.fa	1620412	17	9	T	14	AT	14	AT	46	10	0	0	7
ChrII.fa	1672859	203	0	C	2514	TT	608	TT	608	0	0	0	203
ChrII.fa	1673002	146	1	G	1800	CC	430	CC	429	1	145	0	0
ChrII.fa	1678693	119	0	T	1426	AA	349	AA	349	119	0	0	0
ChrII.fa	1683324	198	0	T	2438	GG	591	GG	591	0	0	198	0
ChrII.fa	1697124	309	3	C	3070	TT	923	TT	922	0	0	0	309
ChrII.fa	1716272	90	19	C	483	CT	16	CT	16	0	19	0	71
ChrII.fa	1716273	87	19	T	69	CT	69	CT	102	0	27	0	60
ChrII.fa	1716288	100	60	G	1242	TT	298	TT	298	0	0	0	100
ChrII.fa	1716318	32	77	A	419	GG	93	GG	93	0	0	32	0
ChrII.fa	1716320	16	76	T	231	GG	43	GG	43	0	0	16	0
ChrII.fa	1716326	37	35	G	507	TT	108	TT	108	0	0	0	37
ChrII.fa	1744767	103	18	T	1	TT	9	GT	25	0	0	29	74
ChrII.fa	1748768	141	9	G	101	AG	101	AG	134	65	0	76	0
ChrII.fa	1784826	136	0	G	1704	AA	406	AA	406	136	0	0	0
ChrII.fa	1818225	118	23	T	46	CT	46	CT	79	0	30	0	88
ChrII.fa	1818233	124	24	T	11	AT	11	AT	43	29	0	0	95
ChrII.fa	1849777	118	1	G	1446	AA	350	AA	350	118	0	0	0
ChrII.fa	1873778	56	17	C	16	CT	16	CT	49	0	43	0	13
ChrII.fa	1873779	57	17	T	108	AT	108	AT	141	21	0	0	36
ChrII.fa	1873782	45	17	C	93	AC	93	AC	126	15	30	0	0
ChrII.fa	1941967	53	3	G	631	TT	136	TT	136	0	0	1	52
ChrII.fa	1941968	43	3	A	537	GG	126	GG	126	0	0	43	0
ChrII.fa	1941981	8	8	C	118	AA	21	AA	21	8	0	0	0
ChrII.fa	1941982	16	8	A	238	TT	45	TT	45	0	0	0	16
ChrII.fa	1948953	11	2	G	17	GT	17	GT	50	0	0	8	3
ChrII.fa	1948954	9	2	A	55	AG	55	AG	87	4	0	5	0
ChrII.fa	1948955	9	2	A	6	AG	6	AG	38	7	0	2	0
ChrII.fa	1950050	31	7	A	1	AA	7	AG	26	23	0	8	0
ChrII.fa	1950053	24	7	T	142	GT	70	GT	70	0	0	14	10
ChrII.fa	1960391	38	14	T	136	AT	136	AT	169	19	0	0	19
ChrII.fa	1960392	34	14	A	203	AG	107	AG	107	11	0	23	0
ChrII.fa	1960393	37	14	T	5	GT	5	GT	37	0	0	6	31
ChrII.fa	1962419	136	0	T	1673	AA	406	AA	406	136	0	0	0
ChrII.fa	1962439	137	2	A	1720	GG	409	GG	409	0	0	137	0
ChrII.fa	1962458	158	2	T	1955	AA	472	AA	472	158	0	0	0
ChrII.fa	1975467	183	1	C	2304	TT	548	TT	548	0	0	0	183
ChrII.fa	1987098	46	2	C	599	AA	135	AA	135	46	0	0	0
ChrII.fa	1987103	8	2	G	124	AA	21	AA	21	8	0	0	0
ChrII.fa	2007715	305	1	A	3070	GG	877	GG	877	1	0	303	1
ChrII.fa	2044929	296	1	A	3070	TT	888	TT	888	0	0	0	296
ChrII.fa	2049892	53	7	T	94	AT	94	AT	127	17	0	0	36
ChrII.fa	2049894	44	7	T	116	GT	116	GT	149	0	1	17	26
ChrII.fa	2049895	43	7	G	29	AG	29	AG	62	10	0	33	0
ChrII.fa	2053514	64	17	A	138	AG	138	AG	171	38	0	26	0
ChrII.fa	2053516	53	17	G	215	CG	203	CG	204	0	29	24	0
ChrII.fa	2053518	51	17	T	22	CT	22	CT	55	0	10	0	41
ChrII.fa	2108180	71	23	T	59	AT	59	AT	92	20	0	0	51
ChrII.fa	2108181	66	23	C	268	AC	240	AC	240	36	30	0	0
ChrII.fa	2108183	57	23	A	39	AC	39	AC	72	42	15	0	0
ChrII.fa	2147728	38	5	C	300	CT	25	CT	25	0	5	0	33
ChrII.fa	2147729	32	5	A	258	AC	40	AC	40	5	27	0	0
ChrII.fa	2148291	12	2	T	166	AA	33	AA	33	12	0	0	0
ChrII.fa	2148295	42	2	G	528	TT	121	TT	121	0	0	0	42
ChrII.fa	2187405	38	20	A	40	AG	40	AG	73	28	0	10	0
ChrII.fa	2187407	37	20	G	111	AG	111	AG	144	15	0	22	0
ChrII.fa	2187408	30	20	C	87	AC	87	AC	120	11	19	0	0
ChrII.fa	2187409	27	20	A	7	AC	7	AC	39	22	5	0	0
ChrII.fa	2200688	39	6	G	17	CG	17	CG	50	0	16	23	0
ChrII.fa	2228775	160	0	T	1975	GG	477	GG	477	0	0	160	0
ChrII.fa	2228777	146	0	G	1781	TT	436	TT	436	0	0	0	146
ChrII.fa	2436580	187	0	C	2343	GG	560	GG	560	0	0	187	0
ChrII.fa	2437855	208	0	A	156	AC	156	AC	189	145	63	0	0
ChrII.fa	2444543	225	1	T	2687	CC	671	CC	671	0	225	0	0
ChrII.fa	2676336	171	1	C	2126	TT	495	TT	492	1	0	0	170
ChrII.fa	2788933	47	21	C	46	CG	46	CG	79	0	35	12	0
ChrII.fa	2788934	30	21	A	191	AG	124	AG	124	12	0	18	0
ChrII.fa	2806053	254	1	G	3070	AA	761	AA	761	254	0	0	0
ChrII.fa	2811496	40	15	A	120	AC	120	AC	153	24	16	0	0
ChrII.fa	2811497	43	15	A	94	AT	94	AT	127	27	0	0	16
ChrII.fa	2811498	43	15	T	29	AT	29	AT	62	11	0	1	31
ChrII.fa	2901509	275	1	G	3070	TT	823	TT	823	0	0	0	275
ChrII.fa	3006137	166	0	A	2036	TT	496	TT	496	0	0	0	166
ChrII.fa	3451297	160	4	T	23	GT	23	GT	56	0	0	65	95
ChrII.fa	3481906	104	9	A	39	AC	39	AC	72	65	39	0	0
ChrII.fa	3619002	35	15	T	11	AT	11	AT	43	7	0	0	28
ChrII.fa	3619003	33	15	A	55	AG	55	AG	88	23	0	10	0
ChrII.fa	3619005	33	15	T	123	GT	123	GT	156	0	0	15	18
ChrII.fa	3736739	140	12	C	15	AC	15	AC	48	45	95	0	0
ChrII.fa	3860190	279	15	A	77	AC	77	AC	110	205	72	0	2
ChrII.fa	3959028	13	2	G	47	AG	35	AG	35	11	0	2	0
ChrII.fa	4107660	38	4	G	2	GG	4	AG	30	19	1	18	0
ChrII.fa	4122326	226	0	T	2801	CC	677	CC	677	0	226	0	0
ChrII.fa	4223369	106	9	A	33	AC	33	AC	66	70	36	0	0
ChrII.fa	4254960	60	17	G	64	AG	64	AG	97	18	0	41	1
ChrII.fa	4254961	59	17	A	213	AG	213	AG	230	29	0	30	0
ChrII.fa	4254962	75	17	A	55	AT	55	AT	88	54	0	0	21
ChrII.fa	4400666	301	0	A	3070	CC	901	CC	901	0	301	0	0
ChrII.fa	4422120	13	5	C	169	TT	36	TT	36	0	0	0	13
ChrII.fa	4422123	6	5	T	78	CC	13	CC	13	0	6	0	0
ChrII.fa	4515621	71	27	C	33	AC	33	AC	66	38	32	0	1
ChrII.fa	4538100	429	71	C	440	CT	440	CT	473	0	280	0	149
ChrII.fa	4538173	248	73	A	12	AT	12	AT	45	184	0	0	64
ChrII.fa	4538335	562	88	A	647	AG	647	AG	680	364	0	198	0
ChrII.fa	4538336	597	88	G	817	AG	817	AG	850	223	0	373	1

## Sheet: chr3
# ** CASAVA depth-filtered snp calls **
#$ CMDLINE /usr/local/libexec/CASAVA-1.8.0/filterSmallVariants.pl --projectDir=/data2/110630_SN187_0202_AB09BJABXX_Bernard_Lequere/Aligned/Project_gDNA_Bernard/Sample_LY960/SNP --chrom=ChrIII.fa
#$ SEQ_MAX_DEPTH ChrIII.fa 626.047499960249
#
#$ COLUMNS seq_name pos bcalls_used bcalls_filt ref Q(snp) max_gt Q(max_gt) max_gt|poly_site Q(max_gt|poly_site) A_used C_used G_used T_used
ChrIII.fa	115345	81	42	A	23	AC	23	AC	56	61	20	0	0
ChrIII.fa	115351	106	42	G	72	CG	72	CG	105	0	28	78	0
ChrIII.fa	117108	4	7	T	39	GG	10	GG	10	0	0	4	0
ChrIII.fa	117109	4	7	C	39	GG	10	GG	10	0	0	4	0
ChrIII.fa	117144	12	16	T	175	AA	33	AA	33	12	0	0	0
ChrIII.fa	117145	25	16	T	339	AA	72	AA	72	25	0	0	0
ChrIII.fa	140988	51	13	G	2	GG	5	AG	29	26	0	25	0
ChrIII.fa	227730	147	0	A	1784	TT	417	TT	417	1	0	0	146
ChrIII.fa	276744	300	2	A	872	AG	872	AG	905	158	0	142	0
ChrIII.fa	284657	212	0	C	2627	AA	633	AA	633	212	0	0	0
ChrIII.fa	348545	60	4	G	2	GG	4	CG	31	0	18	42	0
ChrIII.fa	361682	123	8	G	23	AG	23	AG	56	46	0	77	0
ChrIII.fa	419329	283	2	G	3070	TT	849	TT	849	0	0	0	283
ChrIII.fa	578868	78	13	G	1	GG	8	AG	25	31	0	47	0
ChrIII.fa	595130	196	5	T	372	GT	372	GT	405	0	0	76	120
ChrIII.fa	595158	177	8	G	285	AG	285	AG	318	64	0	113	0
ChrIII.fa	595166	151	7	C	45	AC	45	AC	78	39	112	0	0
ChrIII.fa	595501	155	2	C	4	CT	4	CT	35	0	120	0	35
ChrIII.fa	595537	274	0	T	697	CT	697	CT	730	0	123	0	151
ChrIII.fa	595547	261	0	G	764	GT	764	GT	797	0	1	137	123
ChrIII.fa	595618	144	7	A	188	AG	188	AG	221	97	0	47	0
ChrIII.fa	595654	206	13	T	346	CT	346	CT	379	1	76	0	129
ChrIII.fa	595660	164	16	C	165	CT	165	CT	198	0	113	0	51
ChrIII.fa	595882	167	5	A	109	AG	109	AG	142	120	0	47	0
ChrIII.fa	595885	178	5	A	179	AG	179	AG	212	121	0	57	0
ChrIII.fa	595922	255	9	A	953	AG	780	AG	780	120	0	135	0
ChrIII.fa	719957	15	31	C	210	TT	42	TT	42	0	0	0	15
ChrIII.fa	719958	8	31	T	123	AA	21	AA	21	8	0	0	0
ChrIII.fa	719991	23	27	A	297	TT	66	TT	66	0	0	0	23
ChrIII.fa	720001	136	28	C	1692	TT	406	TT	406	0	0	0	136
ChrIII.fa	867875	127	36	T	55	AT	55	AT	88	35	0	0	92
ChrIII.fa	963343	126	1	A	1514	GG	376	GG	376	0	0	126	0
ChrIII.fa	1016311	59	22	G	27	CG	27	CG	60	0	14	45	0
ChrIII.fa	1016313	53	22	T	221	CT	220	CT	225	0	28	0	25
ChrIII.fa	1097549	45	11	C	61	CT	61	CT	94	0	16	0	29
ChrIII.fa	1168328	322	1	T	3070	CC	966	CC	966	0	322	0	0
ChrIII.fa	1168363	216	32	G	2308	AA	510	AA	510	206	0	9	1
ChrIII.fa	1281528	178	5	T	13	GT	13	GT	45	1	0	63	114
ChrIII.fa	1317802	177	2	C	2212	TT	528	TT	528	0	0	0	177
ChrIII.fa	1374938	174	0	A	2160	TT	520	TT	520	0	0	0	174
ChrIII.fa	1493950	143	1	A	296	AG	296	AG	329	86	0	57	0
ChrIII.fa	1494129	304	14	T	358	GT	358	GT	391	0	0	101	203
ChrIII.fa	1494164	191	8	A	351	AG	351	AG	384	118	0	73	0
ChrIII.fa	1494282	185	5	G	270	AG	270	AG	303	66	0	119	0
ChrIII.fa	1550897	172	24	T	3	GT	3	GT	33	1	0	57	114
ChrIII.fa	1685487	53	10	G	62	AG	62	AG	95	15	0	38	0
ChrIII.fa	1685492	70	10	C	31	AC	31	AC	64	17	53	0	0
ChrIII.fa	1756401	90	26	A	143	AT	143	AT	176	57	0	0	33
ChrIII.fa	1756402	90	26	A	334	AT	279	AT	279	42	0	0	48
ChrIII.fa	1756403	78	26	T	120	AT	120	AT	153	27	1	0	50
ChrIII.fa	1765401	383	0	G	3070	TT	1150	TT	1150	0	0	0	383
ChrIII.fa	1774234	25	3	A	6	AT	6	AT	38	20	0	0	5
ChrIII.fa	1774235	22	3	T	43	CT	43	CT	76	0	6	0	16
ChrIII.fa	1774236	18	3	C	108	CG	100	CG	101	0	7	11	0
ChrIII.fa	1774237	19	3	T	36	AT	36	AT	69	7	0	0	12
ChrIII.fa	1792541	265	0	T	3070	CC	789	CC	789	1	264	0	0
ChrIII.fa	1814410	150	17	A	61	AC	61	AC	94	95	55	0	0
ChrIII.fa	2087770	129	11	A	26	AT	26	AT	59	96	0	0	33
ChrIII.fa	2242183	116	4	T	564	AT	195	AT	195	72	0	0	44
ChrIII.fa	2242187	122	4	T	884	AA	42	AA	42	98	0	0	24
ChrIII.fa	2279156	290	0	C	3070	TT	828	TT	828	0	1	0	289
ChrIII.fa	2381979	296	0	G	3070	TT	888	TT	888	0	0	0	296
ChrIII.fa	2448324	468	119	G	291	CG	291	CG	324	7	155	306	0
