# Supplementary material for: A Genetic Screen for Functional Partners of Condensin in Fission Yeast
Source: G3 (Bethesda). 2013 Dec 20;4(2):373–81. doi: 10.1534/g3.113.009621 (PMC3931570; doi:10.1534/g3.113.009621)
Supplement: Supporting Information [file supp_g3.113.009621_FileS2.xlsx]

## Sheet: chr1
# ** CASAVA depth-filtered snp calls **
#$ CMDLINE /usr/local/libexec/CASAVA-1.8.0/filterSmallVariants.pl --projectDir=/data2/110630_SN187_0202_AB09BJABXX_Bernard_Lequere/Aligned/Project_gDNA_Bernard/Sample_LY1259/SNP --chrom=ChrI.fa
#$ SEQ_MAX_DEPTH ChrI.fa 767.806229860981
#
seq_name	pos	bcalls_used	bcalls_filt	ref	Q(snp)	max_gt	Q(max_gt)	max_gt|poly_site	Q(max_gt|poly_site)	A_used	C_used	G_used	T_used
ChrI.fa	18475	292	1	C	1107	CT	413	CT	413	0	109	0	183	1	2
ChrI.fa	216517	60	12	A	1	AA	7	AC	27	42	18	0	0	3	4
ChrI.fa	216551	76	15	T	9	CT	9	CT	41	0	23	0	53	1	2
ChrI.fa	470380	16	43	C	186	GG	23	GG	23	0	1	15	0	1	0
ChrI.fa	470381	13	43	G	185	TT	36	TT	36	0	0	0	13	2	3
ChrI.fa	470383	1	42	T	4	TT	3	AT	3	1	0	0	0	4	5
ChrI.fa	470389	5	33	A	61	GG	12	GG	12	0	0	5	0	1	2
ChrI.fa	470391	29	33	C	378	AA	84	AA	84	29	0	0	0	11	10
ChrI.fa	477739	263	1	T	3067	CC	779	CC	779	1	262	0	0	1	2
ChrI.fa	523603	274	1	G	3070	AA	821	AA	821	274	0	0	0	2	1
ChrI.fa	523883	167	0	G	2015	AA	500	AA	500	167	0	0	0	9	10
ChrI.fa	527156	412	0	C	3070	AA	1229	AA	1228	411	0	1	0	3	4
ChrI.fa	534877	220	0	C	2624	AA	653	AA	653	219	0	1	0
ChrI.fa	544883	257	1	C	2924	TT	764	TT	764	0	0	1	256
ChrI.fa	670034	73	35	C	260	AC	260	AC	280	37	36	0	0
ChrI.fa	670036	58	35	T	4	CT	4	CT	34	0	12	0	46
ChrI.fa	682994	37	8	C	28	CT	28	CT	61	0	29	0	8
ChrI.fa	682997	37	8	C	49	CG	49	CG	82	0	26	11	0
ChrI.fa	759334	230	0	G	2766	TT	687	TT	687	0	0	0	230
ChrI.fa	862962	40	39	C	23	CT	23	CT	56	1	30	0	9
ChrI.fa	862964	41	39	G	507	TT	120	TT	120	0	0	0	41
ChrI.fa	862965	48	39	A	33	AT	33	AT	66	35	0	0	13
ChrI.fa	987889	13	0	G	2	GG	4	AG	31	5	0	8	0
ChrI.fa	1260425	264	1	A	3070	TT	791	TT	791	0	0	0	264
ChrI.fa	1274803	130	18	T	419	AT	418	AT	424	67	0	0	63
ChrI.fa	1274805	129	18	T	35	AT	35	AT	68	33	0	0	96
ChrI.fa	1404744	255	1	T	2972	AA	762	AA	762	255	0	0	0
ChrI.fa	1664907	219	2	T	2665	AA	656	AA	656	219	0	0	0
ChrI.fa	1726802	125	0	A	1494	CC	367	CC	367	0	125	0	0
ChrI.fa	1783458	204	1	C	2451	TT	611	TT	611	0	0	0	204
ChrI.fa	1936299	103	39	G	95	AG	95	AG	128	32	0	71	0
ChrI.fa	1999192	245	0	G	2945	CC	732	CC	732	0	245	0	0
ChrI.fa	2093954	302	2	A	3070	GG	899	GG	899	0	0	301	1
ChrI.fa	2104091	271	4	G	3070	TT	802	TT	799	1	0	0	270
ChrI.fa	2104097	261	4	C	3070	AA	780	AA	780	261	0	0	0
ChrI.fa	2154491	78	30	T	115	AT	115	AT	148	26	0	0	52
ChrI.fa	2154493	88	30	G	195	AG	195	AG	228	37	0	51	0
ChrI.fa	2154494	94	30	T	102	GT	102	GT	135	0	0	31	63
ChrI.fa	2288241	45	28	G	59	CG	59	CG	92	0	13	32	0
ChrI.fa	2288242	50	28	G	139	AG	139	AG	172	21	0	29	0
ChrI.fa	2288243	51	28	A	85	AT	85	AT	118	34	0	0	17
ChrI.fa	2421577	104	33	C	528	AC	155	AC	155	69	34	0	1
ChrI.fa	2506044	325	2	T	3070	AA	973	AA	973	325	0	0	0
ChrI.fa	2510060	89	15	T	77	AT	77	AT	110	26	0	0	63
ChrI.fa	2510063	73	15	C	105	AC	105	AC	138	25	48	0	0
ChrI.fa	2510064	70	15	T	1	TT	8	CT	26	0	15	0	55
ChrI.fa	2523704	182	10	A	103	AC	103	AC	136	99	81	0	2
ChrI.fa	2588020	95	17	A	274	AC	274	AC	307	51	44	0	0
ChrI.fa	2588021	95	17	C	331	AC	328	AC	332	49	46	0	0
ChrI.fa	2588073	74	15	T	263	AT	262	AT	286	37	1	0	36
ChrI.fa	2594263	92	17	C	153	CT	153	CT	186	0	57	1	34
ChrI.fa	2594265	111	17	A	138	AT	138	AT	171	74	0	0	37
ChrI.fa	2594327	24	12	C	323	AA	69	AA	69	24	0	0	0
ChrI.fa	2594328	9	11	A	134	CC	24	CC	24	0	9	0	0
ChrI.fa	2594350	12	8	A	168	TT	33	TT	33	0	0	0	12
ChrI.fa	2594351	21	8	T	283	AA	60	AA	60	21	0	0	0
ChrI.fa	2594391	66	16	A	23	AT	23	AT	56	50	0	1	15
ChrI.fa	2594394	80	16	C	86	CT	86	CT	119	0	55	0	25
ChrI.fa	2605764	470	10	T	3070	AA	1399	AA	1399	469	0	0	1
ChrI.fa	2605861	62	18	T	24	GT	24	GT	57	0	0	15	47
ChrI.fa	2605863	77	18	T	102	AT	102	AT	135	27	0	0	50
ChrI.fa	2605864	80	18	A	29	AC	29	AC	62	59	20	0	1
ChrI.fa	2607669	89	22	A	17	AT	17	AT	50	68	0	0	21
ChrI.fa	2683903	47	16	C	31	CT	31	CT	64	1	35	0	11
ChrI.fa	2683904	48	16	C	192	AC	192	AC	207	25	23	0	0
ChrI.fa	2747078	336	0	A	3070	GG	993	GG	993	1	0	335	0
ChrI.fa	2759871	50	17	T	233	CT	164	CT	164	0	30	0	20
ChrI.fa	2759873	56	17	T	6	CT	6	CT	37	0	12	0	44
ChrI.fa	2958950	161	18	A	320	AG	320	AG	353	89	0	72	0
ChrI.fa	3111508	174	1	A	2114	GG	520	GG	520	0	0	174	0
ChrI.fa	3115841	263	1	C	2953	AA	769	AA	769	262	1	0	0
ChrI.fa	3119299	320	1	G	3070	AA	936	AA	934	315	3	1	1
ChrI.fa	3125118	78	24	A	97	AT	97	AT	130	53	0	0	25
ChrI.fa	3125120	82	24	A	207	AT	207	AT	240	46	0	0	36
ChrI.fa	3125121	67	24	T	19	AT	19	AT	52	16	0	0	51
ChrI.fa	3178497	42	22	C	214	CT	145	CT	145	0	17	0	25
ChrI.fa	3179238	297	3	G	3070	CC	880	CC	878	2	295	0	0
ChrI.fa	3197531	32	13	T	174	GT	105	GT	105	0	0	21	11
ChrI.fa	3197534	35	16	G	54	GT	54	GT	87	0	0	24	11
ChrI.fa	3204845	168	2	G	1990	AA	464	AA	464	167	0	1	0
ChrI.fa	3289534	49	18	G	24	GT	24	GT	57	1	0	20	28
ChrI.fa	3387032	226	1	G	2736	TT	675	TT	675	0	0	0	226
ChrI.fa	3417063	144	7	T	21	GT	21	GT	54	0	0	56	88
ChrI.fa	3450131	27	21	T	340	AG	61	AG	64	8	0	19	0
ChrI.fa	3460318	54	11	T	9	CT	9	CT	42	0	12	0	42
ChrI.fa	3460321	54	11	T	76	CT	76	CT	109	0	17	0	37
ChrI.fa	3460322	56	11	G	1	GG	7	GT	27	0	1	44	11
ChrI.fa	3538416	22	3	C	286	TT	63	TT	63	0	0	0	22
ChrI.fa	3538417	14	3	G	191	CC	39	CC	39	0	14	0	0
ChrI.fa	3538454	2	11	T	27	AA	5	AA	5	2	0	0	0
ChrI.fa	3538456	7	11	A	116	TT	18	TT	18	0	0	0	7
ChrI.fa	3548900	142	45	A	427	AT	384	AT	384	66	0	1	75
ChrI.fa	3548913	198	27	T	2367	AA	591	AA	591	198	0	0	0
ChrI.fa	3576756	248	0	T	689	CT	689	CT	722	0	120	0	128
ChrI.fa	3583106	363	0	G	3070	AA	1089	AA	1089	363	0	0	0
ChrI.fa	3665611	29	19	T	210	CT	88	CT	88	0	20	0	9
ChrI.fa	3992214	234	28	C	2521	AA	641	AA	641	230	3	0	1
ChrI.fa	4208859	243	8	T	117	GT	117	GT	150	2	0	101	140
ChrI.fa	4304169	94	15	G	73	AG	73	AG	106	27	0	67	0
ChrI.fa	4304173	97	15	G	1	GG	6	AG	29	21	0	76	0
ChrI.fa	4374343	71	21	G	9	AG	9	AG	41	15	0	56	0
ChrI.fa	4374344	78	21	G	407	AG	168	AG	168	50	0	28	0
ChrI.fa	4375421	313	0	A	3070	TT	924	TT	924	1	0	0	312
ChrI.fa	4407494	18	14	T	84	GT	84	GT	116	0	0	10	8
ChrI.fa	4407496	23	14	C	20	CG	20	CG	53	0	19	4	0
ChrI.fa	4410191	63	38	C	39	CG	39	CG	72	0	45	17	1
ChrI.fa	4410192	61	38	G	112	CG	112	CG	145	0	24	37	0
ChrI.fa	4410194	62	38	G	93	AG	93	AG	126	21	0	41	0
ChrI.fa	4431860	32	2	T	393	AA	93	AA	93	32	0	0	0
ChrI.fa	4431861	23	2	A	281	TT	66	TT	66	0	0	0	23
ChrI.fa	4431867	6	14	G	101	CC	15	CC	15	0	6	0	0
ChrI.fa	4431868	14	14	C	213	AA	39	AA	39	14	0	0	0
ChrI.fa	4441486	32	24	C	39	CG	39	CG	72	0	17	15	0
ChrI.fa	4442714	355	2	G	3070	AA	1063	AA	1063	355	0	0	0
ChrI.fa	4643098	295	1	G	3070	CC	881	CC	881	1	294	0	0
ChrI.fa	4648160	113	34	G	905	TT	182	TT	182	0	0	14	99
ChrI.fa	4919603	327	1	A	3070	GG	981	GG	981	0	0	327	0
ChrI.fa	5142627	40	23	A	104	AG	104	AG	137	25	0	15	0
ChrI.fa	5142629	47	22	T	95	GT	95	GT	128	0	0	18	29
ChrI.fa	5142630	58	21	A	40	AT	40	AT	73	40	0	0	18
ChrI.fa	5224616	131	65	C	80	CT	80	CT	113	1	93	0	37
ChrI.fa	5271466	95	7	A	624	TT	9	TT	9	23	0	0	72
ChrI.fa	5368265	19	5	C	165	AC	17	AC	17	16	3	0	0
ChrI.fa	5368266	12	5	A	55	AT	37	AT	38	3	0	0	9
ChrI.fa	5400080	319	0	C	3070	TT	947	TT	946	1	0	1	317
ChrI.fa	5426636	293	45	C	268	CT	268	CT	301	0	187	1	105
ChrI.fa	5559383	96	20	A	97	AT	97	AT	130	42	1	1	52

## Sheet: chr2
# ** CASAVA depth-filtered snp calls **
#$ CMDLINE /usr/local/libexec/CASAVA-1.8.0/filterSmallVariants.pl --projectDir=/data2/110630_SN187_0202_AB09BJABXX_Bernard_Lequere/Aligned/Project_gDNA_Bernard/Sample_LY1259/SNP --chrom=ChrII.fa
#$ SEQ_MAX_DEPTH ChrII.fa 775.006319493947
#
#$ COLUMNS seq_name pos bcalls_used bcalls_filt ref Q(snp) max_gt Q(max_gt) max_gt|poly_site Q(max_gt|poly_site) A_used C_used G_used T_used
ChrII.fa	128008	187	18	A	548	AT	548	AT	581	96	0	0	91
ChrII.fa	128009	183	18	T	371	AT	371	AT	404	75	0	0	108
ChrII.fa	146080	57	25	C	59	CT	59	CT	92	1	38	0	18
ChrII.fa	146087	88	25	C	56	CT	56	CT	89	0	64	1	23
ChrII.fa	153578	466	25	G	1206	AG	1206	AG	1239	215	0	251	0
ChrII.fa	153579	476	25	C	1293	CT	1293	CT	1326	0	249	1	226
ChrII.fa	153847	468	8	C	1318	CT	1318	CT	1351	0	241	0	227
ChrII.fa	153849	459	7	A	1255	AG	1255	AG	1288	235	0	224	0
ChrII.fa	153954	496	25	A	759	AT	759	AT	792	303	1	0	192
ChrII.fa	153964	396	50	T	133	AT	133	AT	166	110	0	0	286
ChrII.fa	153987	416	30	T	552	CT	552	CT	585	1	146	0	269
ChrII.fa	154044	430	29	G	586	AG	586	AG	619	152	0	278	0
ChrII.fa	154443	382	20	T	466	CT	466	CT	499	0	135	0	247
ChrII.fa	154446	349	20	G	241	AG	241	AG	274	105	0	244	0
ChrII.fa	154603	422	3	A	966	AC	966	AC	999	237	185	0	0
ChrII.fa	266718	306	1	A	3070	CC	916	CC	916	0	306	0	0
ChrII.fa	266780	279	1	T	3070	AA	834	AA	834	279	0	0	0
ChrII.fa	276539	198	1	A	2311	TT	588	TT	588	0	1	0	197
ChrII.fa	501711	301	6	C	3070	TT	855	TT	855	0	1	0	300
ChrII.fa	520829	340	1	G	3070	AA	1017	AA	1017	339	0	0	1
ChrII.fa	603280	48	62	T	592	AA	141	AA	141	48	0	0	0
ChrII.fa	603282	15	44	A	190	TT	42	TT	42	0	0	0	15
ChrII.fa	603305	18	25	A	245	CC	51	CC	51	0	18	0	0
ChrII.fa	603306	41	25	C	506	AA	118	AA	118	41	0	0	0
ChrII.fa	685728	262	1	G	3070	AA	770	AA	770	261	0	1	0
ChrII.fa	699951	128	85	T	1529	GG	382	GG	382	0	0	128	0
ChrII.fa	699952	134	86	G	1569	TT	398	TT	398	0	0	0	134
ChrII.fa	699961	121	82	A	1464	TT	361	TT	361	0	0	0	121
ChrII.fa	700011	39	11	A	489	CC	112	CC	112	0	39	0	0
ChrII.fa	700012	20	11	C	256	AA	55	AA	55	20	0	0	0
ChrII.fa	700024	11	6	T	148	AA	28	AA	28	11	0	0	0
ChrII.fa	700028	66	6	A	779	TT	191	TT	191	1	0	0	65
ChrII.fa	700113	330	2	A	3070	TT	973	TT	973	1	0	0	329
ChrII.fa	820512	56	8	G	52	AG	52	AG	85	28	0	28	0
ChrII.fa	869806	215	4	G	2529	CC	604	CC	604	1	212	1	1
ChrII.fa	879033	305	3	T	3070	AA	915	AA	915	305	0	0	0
ChrII.fa	888600	53	17	C	15	AC	15	AC	47	12	41	0	0
ChrII.fa	888601	47	17	C	247	CG	114	CG	114	0	16	31	0
ChrII.fa	888602	41	17	G	138	AG	138	AG	171	19	0	22	0
ChrII.fa	923543	329	1	C	3070	AA	983	AA	983	329	0	0	0
ChrII.fa	943554	294	2	C	3070	AA	858	AA	858	293	1	0	0
ChrII.fa	953201	239	2	A	2850	GG	714	GG	714	0	0	239	0
ChrII.fa	967094	131	13	A	1553	GG	381	GG	381	1	0	130	0
ChrII.fa	990639	222	2	C	2691	TT	665	TT	665	0	0	0	222
ChrII.fa	997702	6	0	C	39	AA	15	AA	15	6	0	0	0
ChrII.fa	997725	5	1	A	31	GG	9	GG	9	0	0	5	0
ChrII.fa	1155903	284	0	T	3070	AA	849	AA	849	283	1	0	0
ChrII.fa	1159678	246	5	G	2926	CC	737	CC	737	0	246	0	0
ChrII.fa	1159694	209	6	A	2498	TT	625	TT	625	0	0	0	209
ChrII.fa	1163155	68	28	T	312	AT	198	AT	198	40	0	0	28
ChrII.fa	1165288	283	12	A	5	AC	5	AC	36	170	113	0	0
ChrII.fa	1238931	330	0	G	3070	AA	990	AA	990	330	0	0	0
ChrII.fa	1308619	88	17	T	66	GT	66	GT	99	0	0	24	64
ChrII.fa	1422317	261	1	T	3070	AA	780	AA	780	261	0	0	0
ChrII.fa	1553976	309	0	A	3070	TT	927	TT	927	0	0	0	309
ChrII.fa	1555935	412	1	C	1312	AC	1201	AC	1201	210	201	1	0
ChrII.fa	1583134	233	3	C	2744	TT	678	TT	675	1	0	0	232
ChrII.fa	1668457	148	0	T	1737	CC	438	CC	438	0	148	0	0
ChrII.fa	1672859	239	1	C	2853	TT	716	TT	716	0	0	0	239
ChrII.fa	1673002	180	0	G	2213	CC	539	CC	539	0	180	0	0
ChrII.fa	1678693	120	2	T	1392	AA	348	AA	348	120	0	0	0
ChrII.fa	1683324	226	1	T	2671	GG	673	GG	673	0	0	226	0
ChrII.fa	1697124	409	0	C	3070	TT	1200	TT	1200	0	1	0	408
ChrII.fa	1716272	127	25	C	875	TT	141	TT	141	0	18	0	109
ChrII.fa	1716273	114	25	T	112	CT	112	CT	145	1	45	0	68
ChrII.fa	1716288	104	77	G	1219	TT	292	TT	292	0	0	1	103
ChrII.fa	1716318	44	103	A	544	GG	129	GG	129	0	0	44	0
ChrII.fa	1716320	30	103	T	388	GG	87	GG	87	0	0	30	0
ChrII.fa	1716326	44	47	G	569	TT	129	TT	129	0	0	0	44
ChrII.fa	1748768	138	12	G	113	AG	113	AG	146	66	0	71	1
ChrII.fa	1784826	192	1	G	2309	AA	572	AA	572	192	0	0	0
ChrII.fa	1818225	99	31	T	71	CT	71	CT	104	0	28	0	71
ChrII.fa	1849777	230	1	G	2703	AA	674	AA	674	227	0	1	2
ChrII.fa	1873779	56	31	T	17	AT	17	AT	50	14	0	0	42
ChrII.fa	1873782	40	31	C	102	AC	102	AC	135	15	25	0	0
ChrII.fa	1874289	184	39	C	27	CT	27	CT	60	0	134	0	50
ChrII.fa	1941967	38	10	G	474	TT	111	TT	111	0	0	0	38
ChrII.fa	1941968	27	10	A	329	GG	78	GG	78	0	0	27	0
ChrII.fa	1941981	16	7	C	203	AA	45	AA	45	16	0	0	0
ChrII.fa	1941982	23	7	A	254	TT	33	TT	33	1	0	0	22
ChrII.fa	1948954	8	2	A	5	AG	5	AG	36	6	0	2	0
ChrII.fa	1948955	9	2	A	57	AG	57	AG	66	5	0	4	0
ChrII.fa	1950050	32	10	A	8	AG	8	AG	40	25	0	7	0
ChrII.fa	1950053	34	9	T	152	GT	150	GT	155	0	0	18	16
ChrII.fa	1960391	55	24	T	3	TT	3	AT	33	12	0	0	43
ChrII.fa	1960392	54	24	A	165	AG	165	AG	198	29	0	25	0
ChrII.fa	1960393	64	24	T	92	GT	92	GT	125	0	0	21	43
ChrII.fa	1962419	224	4	T	2649	AA	671	AA	671	224	0	0	0
ChrII.fa	1962439	232	9	A	2797	GG	695	GG	695	0	0	232	0
ChrII.fa	1962458	236	7	T	2838	AA	707	AA	707	236	0	0	0
ChrII.fa	1975467	216	1	C	2595	TT	645	TT	645	0	0	0	216
ChrII.fa	1987098	54	5	C	680	AA	159	AA	159	54	0	0	0
ChrII.fa	1987103	6	5	G	104	AA	15	AA	15	6	0	0	0
ChrII.fa	2007715	303	3	A	3070	GG	885	GG	883	0	1	301	1
ChrII.fa	2044929	323	0	A	3070	TT	966	TT	966	0	0	0	323
ChrII.fa	2049892	58	7	T	102	AT	102	AT	135	21	0	0	37
ChrII.fa	2049894	55	7	T	141	GT	141	GT	174	0	0	23	32
ChrII.fa	2049895	62	7	G	22	AG	22	AG	55	15	0	47	0
ChrII.fa	2053514	67	9	A	206	AG	206	AG	239	34	0	33	0
ChrII.fa	2053516	65	10	G	335	CG	118	CG	118	0	44	21	0
ChrII.fa	2108180	63	22	T	4	AT	4	AT	35	14	0	0	49
ChrII.fa	2108181	63	22	C	211	AC	211	AC	236	32	31	0	0
ChrII.fa	2108183	65	22	A	21	AC	21	AC	54	49	16	0	0
ChrII.fa	2132459	622	8	T	1867	CT	1799	CT	1799	0	321	1	300
ChrII.fa	2148291	8	7	T	125	AA	21	AA	21	8	0	0	0
ChrII.fa	2148295	44	7	G	544	TT	129	TT	129	0	0	0	44
ChrII.fa	2187405	35	22	A	4	AG	4	AG	35	28	0	7	0
ChrII.fa	2187407	35	22	G	134	AG	134	AG	167	17	0	18	0
ChrII.fa	2187408	26	22	C	65	AC	65	AC	98	9	17	0	0
ChrII.fa	2187409	26	22	A	25	AC	25	AC	58	20	6	0	0
ChrII.fa	2219930	48	23	G	182	GT	182	GT	213	0	0	24	24
ChrII.fa	2228775	340	13	T	3070	GG	1020	GG	1020	0	0	340	0
ChrII.fa	2228777	336	13	G	3070	TT	1008	TT	1008	0	0	0	336
ChrII.fa	2268188	213	22	T	134	AT	134	AT	167	61	0	0	152
ChrII.fa	2297038	215	0	A	2624	GG	643	GG	643	0	0	215	0
ChrII.fa	2436580	226	0	C	2721	GG	677	GG	677	0	0	226	0
ChrII.fa	2437855	371	2	A	210	AC	210	AC	243	257	114	0	0
ChrII.fa	2444543	242	0	T	2828	CC	718	CC	718	0	242	0	0
ChrII.fa	2676336	175	1	C	2123	TT	522	TT	522	0	0	0	175
ChrII.fa	2788933	56	36	C	27	CG	27	CG	60	0	43	12	1
ChrII.fa	2788934	49	36	A	256	AG	121	AG	121	16	0	33	0
ChrII.fa	2788937	37	36	T	22	AT	22	AT	55	9	0	0	28
ChrII.fa	2798041	31	14	T	76	CT	76	CT	109	0	11	0	20
ChrII.fa	2798042	31	14	T	111	GT	111	GT	144	0	0	13	18
ChrII.fa	2806053	259	1	G	3070	AA	777	AA	776	259	0	0	0
ChrII.fa	2811495	45	40	C	5	CT	5	CT	36	2	34	0	9
ChrII.fa	2811496	40	40	A	146	AC	146	AC	177	19	20	0	1
ChrII.fa	2811497	49	40	A	88	AT	88	AT	121	33	0	0	16
ChrII.fa	2901509	299	1	G	3070	TT	895	TT	895	0	0	0	299
ChrII.fa	3006137	187	2	A	2207	TT	557	TT	557	0	0	0	187
ChrII.fa	3250141	80	12	C	128	CT	128	CT	161	0	51	0	29
ChrII.fa	3619003	40	25	A	40	AG	40	AG	73	29	0	11	0
ChrII.fa	3619005	38	25	T	127	GT	127	GT	160	0	0	18	20
ChrII.fa	3619007	38	25	G	37	GT	37	GT	70	0	0	27	11
ChrII.fa	3860190	321	19	A	14	AC	14	AC	47	236	82	1	2
ChrII.fa	4107660	39	9	G	5	AG	5	AG	36	19	0	20	0
ChrII.fa	4122326	248	1	T	2975	CC	737	CC	737	0	248	0	0
ChrII.fa	4400666	281	1	A	3070	CC	830	CC	830	1	280	0	0
ChrII.fa	4515621	60	28	C	57	AC	57	AC	90	39	21	0	0
ChrII.fa	4537395	615	150	G	591	AG	591	AG	624	216	0	399	0
ChrII.fa	4537402	685	150	A	575	AG	575	AG	608	470	0	215	0
ChrII.fa	4538038	33	107	A	402	GG	96	GG	96	0	0	33	0
ChrII.fa	4538048	458	150	C	1678	CT	888	CT	888	1	188	1	268
ChrII.fa	4538052	677	151	A	3070	GG	2029	GG	2029	0	0	677	0
ChrII.fa	4538091	618	91	T	3070	CC	393	CC	393	2	495	1	120
ChrII.fa	4538100	146	61	C	1612	TT	389	TT	389	0	1	0	145
ChrII.fa	4538102	27	60	G	272	AA	32	AA	32	26	0	1	0
ChrII.fa	4538126	45	109	C	538	GG	132	GG	132	0	0	45	0
ChrII.fa	4538128	135	111	A	1194	GT	8	GT	10	0	0	102	33
ChrII.fa	4538155	617	208	T	613	GT	613	GT	646	0	0	201	416
ChrII.fa	4538164	482	97	A	3070	TT	1447	TT	1447	0	0	0	482
ChrII.fa	4538173	40	95	A	394	TT	89	TT	89	3	1	0	36
ChrII.fa	4538174	2	72	C	2	CC	4	AC	3	1	0	1	0
ChrII.fa	4538331	23	35	G	3	GG	3	AG	32	4	0	19	0
ChrII.fa	4538335	135	53	A	1040	GG	123	GG	123	20	0	115	0
ChrII.fa	4538336	185	53	G	887	AG	150	AG	150	126	0	59	0
ChrII.fa	4538340	341	53	A	7	AG	7	AG	39	251	0	89	1

## Sheet: chr3
# ** CASAVA depth-filtered snp calls **
#$ CMDLINE /usr/local/libexec/CASAVA-1.8.0/filterSmallVariants.pl --projectDir=/data2/110630_SN187_0202_AB09BJABXX_Bernard_Lequere/Aligned/Project_gDNA_Bernard/Sample_LY1259/SNP --chrom=ChrIII.fa
#$ SEQ_MAX_DEPTH ChrIII.fa 741.75737988838
#
#$ COLUMNS seq_name pos bcalls_used bcalls_filt ref Q(snp) max_gt Q(max_gt) max_gt|poly_site Q(max_gt|poly_site) A_used C_used G_used T_used
ChrIII.fa	61639	362	2	C	3070	TT	1070	TT	1067	2	0	0	360
ChrIII.fa	221306	3	0	A	1	AA	6	TT	5	0	0	0	3
ChrIII.fa	227730	206	1	A	2470	TT	616	TT	616	0	0	0	206
ChrIII.fa	276744	327	6	A	703	AG	703	AG	736	189	1	137	0
ChrIII.fa	284657	268	2	C	3070	AA	803	AA	803	268	0	0	0
ChrIII.fa	595130	375	7	T	702	GT	702	GT	735	0	0	151	224
ChrIII.fa	595158	337	19	G	116	AG	116	AG	149	94	0	243	0
ChrIII.fa	595537	635	3	T	1276	CT	1276	CT	1309	1	269	1	364
ChrIII.fa	595547	609	3	G	1279	GT	1279	GT	1312	0	0	353	256
ChrIII.fa	595597	326	29	T	130	CT	130	CT	163	0	95	1	230
ChrIII.fa	595618	385	14	A	369	AG	369	AG	402	259	0	126	0
ChrIII.fa	595654	399	33	T	470	CT	470	CT	503	0	138	0	261
ChrIII.fa	595660	356	46	C	135	CT	135	CT	168	0	258	0	98
ChrIII.fa	595882	385	11	A	60	AG	60	AG	93	283	0	102	0
ChrIII.fa	595885	392	11	A	254	AG	254	AG	287	269	0	123	0
ChrIII.fa	595922	562	20	A	1757	AG	1756	AG	1772	281	0	280	1
ChrIII.fa	719957	9	34	C	149	TT	24	TT	24	0	0	0	9
ChrIII.fa	719958	4	34	T	66	AA	4	AA	3	3	0	1	0
ChrIII.fa	719991	13	28	A	173	TT	36	TT	36	0	0	0	13
ChrIII.fa	720001	156	28	C	1885	TT	466	TT	466	0	0	0	156
ChrIII.fa	963343	187	5	A	2129	GG	553	GG	553	0	0	185	2
ChrIII.fa	1016311	66	20	G	72	CG	72	CG	105	0	20	46	0
ChrIII.fa	1016313	72	20	T	134	CT	134	CT	167	0	26	0	46
ChrIII.fa	1097549	48	8	C	13	CT	13	CT	46	0	20	0	28
ChrIII.fa	1168328	339	3	T	3070	CC	1015	CC	1015	0	339	0	0
ChrIII.fa	1168363	206	49	G	1995	AA	440	AA	440	191	1	14	0
ChrIII.fa	1317802	190	0	C	2232	TT	525	TT	525	0	1	0	189
ChrIII.fa	1374938	270	1	A	3070	TT	803	TT	802	0	0	2	268
ChrIII.fa	1493950	186	1	A	317	AG	317	AG	350	117	0	68	1
ChrIII.fa	1494129	357	10	T	496	GT	496	GT	529	0	0	128	229
ChrIII.fa	1494164	259	13	A	185	AG	185	AG	218	181	0	78	0
ChrIII.fa	1494282	248	13	G	193	AG	193	AG	226	79	1	168	0
ChrIII.fa	1685486	49	7	A	62	AG	62	AG	95	34	0	15	0
ChrIII.fa	1685487	47	7	G	80	AG	80	AG	113	16	0	31	0
ChrIII.fa	1685492	64	7	C	13	AC	13	AC	46	15	49	0	0
ChrIII.fa	1756401	90	28	A	119	AT	119	AT	152	58	0	0	32
ChrIII.fa	1756402	89	28	A	295	AT	267	AT	267	44	0	0	45
ChrIII.fa	1756403	86	28	T	172	AT	172	AT	205	35	0	0	51
ChrIII.fa	1765401	431	3	G	3070	TT	1288	TT	1288	0	0	0	431
ChrIII.fa	1774236	36	6	C	235	CG	97	CG	97	0	10	26	0
ChrIII.fa	1774237	28	6	T	90	AT	90	AT	123	13	0	0	15
ChrIII.fa	1792541	311	1	T	3070	CC	930	CC	930	0	311	0	0
ChrIII.fa	2087770	151	18	A	115	AT	115	AT	148	106	0	0	45
ChrIII.fa	2279156	295	0	C	3070	TT	885	TT	885	0	0	0	295
ChrIII.fa	2381979	334	2	G	3070	TT	1002	TT	1002	0	0	0	334
ChrIII.fa	2448324	640	200	G	22	CG	22	CG	55	9	186	445	0
