# Supplementary material for: A Genetic Screen for Functional Partners of Condensin in Fission Yeast
Source: G3 (Bethesda). 2013 Dec 20;4(2):373–81. doi: 10.1534/g3.113.009621 (PMC3931570; doi:10.1534/g3.113.009621)
Supplement: Supporting Information [file supp_g3.113.009621_FileS3.xlsx]

## Sheet: chr1
# ** CASAVA depth-filtered snp calls **
#$ CMDLINE /usr/local/libexec/CASAVA-1.8.0/filterSmallVariants.pl --projectDir=/data2/110630_SN187_0202_AB09BJABXX_Bernard_Lequere/Aligned/Project_gDNA_Bernard/Sample_LY1269/SNP --chrom=ChrI.fa
#$ SEQ_MAX_DEPTH ChrI.fa 807.857549686478
#
#$ COLUMNS seq_name pos bcalls_used bcalls_filt ref Q(snp) max_gt Q(max_gt) max_gt|poly_site Q(max_gt|poly_site) A_used C_used G_used T_used
ChrI.fa	18475	576	5	C	2645	CT	154	CT	154	0	168	1	407
ChrI.fa	27414	22	17	C	3	AC	3	AC	33	6	16	0	0
ChrI.fa	72347	771	245	C	3070	AA	697	AA	697	645	125	1	0
ChrI.fa	101870	37	13	G	75	AG	75	AG	108	14	0	23	0
ChrI.fa	101871	40	13	A	128	AG	128	AG	145	22	0	18	0
ChrI.fa	101873	48	13	C	54	CG	54	CG	87	0	31	17	0
ChrI.fa	470380	21	39	C	267	GG	60	GG	60	0	0	21	0
ChrI.fa	470381	14	39	G	180	TT	39	TT	39	0	0	0	14
ChrI.fa	470389	10	30	A	151	GG	27	GG	27	0	0	10	0
ChrI.fa	470391	30	30	C	370	AA	82	AA	82	29	0	0	1
ChrI.fa	482737	54	21	A	33	AG	33	AG	66	40	0	14	0
ChrI.fa	482739	57	21	T	125	GT	125	GT	158	1	0	22	34
ChrI.fa	523603	402	1	G	3070	AA	1206	AA	1206	402	0	0	0
ChrI.fa	523883	282	3	G	3070	AA	844	AA	844	282	0	0	0
ChrI.fa	527156	101	1	C	1230	AA	299	AA	299	101	0	0	0
ChrI.fa	534877	372	1	C	3070	AA	1110	AA	1110	372	0	0	0
ChrI.fa	670034	19	7	C	137	AC	28	AC	28	15	4	0	0
ChrI.fa	670036	24	7	T	35	CT	35	CT	68	0	7	0	17
ChrI.fa	718169	64	7	C	33	CT	33	CT	66	0	34	1	29
ChrI.fa	759334	299	2	G	3070	TT	895	TT	895	0	0	0	299
ChrI.fa	862964	44	17	G	551	TT	129	TT	129	0	0	0	44
ChrI.fa	862965	43	17	A	89	AT	89	AT	122	27	0	0	16
ChrI.fa	957204	43	12	G	63	AG	63	AG	92	24	0	18	1
ChrI.fa	987889	16	3	G	11	AG	11	AG	43	9	0	7	0
ChrI.fa	1274803	7	2	T	52	AT	52	AT	71	3	0	0	4
ChrI.fa	1274805	8	2	T	32	AT	32	AT	64	4	0	0	4
ChrI.fa	1274806	6	2	A	10	AT	10	AT	42	4	0	0	2
ChrI.fa	1424709	45	14	A	510	CT	153	CT	156	0	19	0	26
ChrI.fa	1664907	251	1	T	3038	AA	750	AA	750	251	0	0	0
ChrI.fa	1726802	290	0	A	3070	CC	856	CC	855	0	289	1	0
ChrI.fa	1766367	262	2	G	3070	AA	785	AA	785	262	0	0	0
ChrI.fa	1783458	309	1	C	3070	TT	924	TT	924	0	0	0	309
ChrI.fa	1838705	254	3	C	3022	TT	757	TT	757	0	0	0	254
ChrI.fa	1936294	85	43	G	86	AG	86	AG	119	25	0	60	0
ChrI.fa	1999192	296	2	G	3070	CC	887	CC	887	0	296	0	0
ChrI.fa	2104091	229	3	G	2755	TT	686	TT	686	0	0	0	229
ChrI.fa	2104097	232	2	C	2776	AA	685	AA	682	231	0	1	0
ChrI.fa	2140076	54	23	C	66	CT	66	CT	99	0	26	0	28
ChrI.fa	2154491	67	18	T	39	AT	39	AT	72	19	0	0	48
ChrI.fa	2154493	69	18	G	190	AG	190	AG	223	31	0	38	0
ChrI.fa	2154494	74	18	T	66	GT	66	GT	99	0	0	22	52
ChrI.fa	2288242	57	31	G	248	AG	194	AG	194	32	0	25	0
ChrI.fa	2288243	51	31	A	140	AT	140	AT	173	29	0	0	22
ChrI.fa	2421577	122	38	C	535	AC	260	AC	260	75	47	0	0
ChrI.fa	2421578	120	38	C	41	CG	41	CG	74	0	89	30	1
ChrI.fa	2506044	115	2	T	1419	AA	343	AA	343	115	0	0	0
ChrI.fa	2507461	100	18	A	99	AT	99	AT	132	68	0	0	32
ChrI.fa	2507462	93	18	T	198	AT	198	AT	231	39	0	0	54
ChrI.fa	2507464	88	18	C	55	AC	55	AC	88	24	64	0	0
ChrI.fa	2588020	106	18	A	316	AC	316	AC	349	55	51	0	0
ChrI.fa	2588021	108	18	C	330	AC	330	AC	363	54	54	0	0
ChrI.fa	2588073	113	15	T	368	AT	368	AT	388	57	0	0	56
ChrI.fa	2594263	29	2	C	26	CT	26	CT	59	0	21	0	8
ChrI.fa	2594265	39	2	A	37	AT	37	AT	70	24	0	0	15
ChrI.fa	2594327	10	5	C	138	AA	27	AA	27	10	0	0	0
ChrI.fa	2594328	5	5	A	49	CC	12	CC	12	0	5	0	0
ChrI.fa	2594350	6	3	A	76	TT	15	TT	15	0	0	0	6
ChrI.fa	2594351	11	3	T	162	AA	30	AA	30	11	0	0	0
ChrI.fa	2594394	28	7	C	72	CT	72	CT	105	0	13	0	15
ChrI.fa	2594395	25	7	G	37	CG	37	CG	70	0	11	14	0
ChrI.fa	2605290	74	17	A	6	AC	6	AC	38	53	19	1	1
ChrI.fa	2605764	292	5	T	3070	AA	868	AA	868	292	0	0	0
ChrI.fa	2605861	50	26	T	4	GT	4	GT	34	0	0	10	40
ChrI.fa	2605863	47	26	T	144	AT	144	AT	177	23	1	0	23
ChrI.fa	2605864	45	26	A	125	AC	125	AC	158	25	19	0	1
ChrI.fa	2607669	73	22	A	18	AT	18	AT	51	56	0	0	17
ChrI.fa	2667941	587	4683	A	3070	GG	530	GG	530	95	0	492	0
ChrI.fa	2667965	576	4807	G	3070	AA	641	AA	641	490	0	86	0
ChrI.fa	2683903	47	27	C	93	CT	93	CT	126	0	30	0	17
ChrI.fa	2683904	57	27	C	151	AC	151	AC	184	24	33	0	0
ChrI.fa	2747078	354	5	A	3070	GG	1062	GG	1062	0	0	354	0
ChrI.fa	2759871	60	10	T	236	CT	226	CT	227	0	31	0	29
ChrI.fa	2759873	53	10	T	1	TT	7	CT	27	0	10	0	43
ChrI.fa	2924516	171	8	A	30	AC	30	AC	63	98	73	0	0
ChrI.fa	2937212	136	18	G	37	CG	37	CG	70	0	65	70	1
ChrI.fa	2949976	80	10	T	79	GT	79	GT	112	0	0	23	57
ChrI.fa	2958950	206	25	A	496	AG	496	AG	529	108	0	98	0
ChrI.fa	2976150	105	22	G	29	GT	29	GT	62	0	1	66	38
ChrI.fa	3111508	265	2	A	3070	GG	748	GG	748	1	0	264	0
ChrI.fa	3115841	189	1	C	2182	AA	560	AA	560	188	0	1	0
ChrI.fa	3119299	303	1	G	3070	AA	905	AA	905	302	1	0	0
ChrI.fa	3125118	71	37	A	139	AT	139	AT	172	43	0	0	28
ChrI.fa	3125120	75	37	A	121	AT	121	AT	154	49	0	0	26
ChrI.fa	3125121	64	37	T	1	TT	6	AT	29	13	0	0	51
ChrI.fa	3178497	61	12	C	320	CT	157	CT	157	0	22	0	39
ChrI.fa	3179238	299	0	G	3070	CC	891	CC	890	0	299	0	0
ChrI.fa	3191426	96	20	A	41	AT	41	AT	74	71	0	0	25
ChrI.fa	3197531	80	28	T	354	GT	203	GT	203	0	0	48	32
ChrI.fa	3197534	69	30	G	44	GT	44	GT	77	0	0	48	21
ChrI.fa	3204845	272	3	G	3070	AA	808	AA	808	272	0	0	0
ChrI.fa	3289534	111	22	G	3	GT	3	GT	33	1	0	60	50
ChrI.fa	3387032	383	2	G	3070	TT	1149	TT	1149	0	0	0	383
ChrI.fa	3450131	48	30	T	472	AG	105	AG	108	19	0	29	0
ChrI.fa	3460321	67	18	T	239	CT	238	CT	245	0	35	0	32
ChrI.fa	3460322	71	18	G	168	GT	168	GT	201	0	0	41	30
ChrI.fa	3538416	23	2	C	304	TT	66	TT	66	0	0	0	23
ChrI.fa	3538417	13	2	G	179	CC	36	CC	36	0	13	0	0
ChrI.fa	3538454	5	8	T	82	AA	12	AA	12	5	0	0	0
ChrI.fa	3538456	11	8	A	171	TT	30	TT	30	0	0	0	11
ChrI.fa	3548913	245	6	T	2829	AA	720	AA	720	245	0	0	0
ChrI.fa	3576756	177	1	T	795	CT	378	CT	378	0	109	1	67
ChrI.fa	3583106	269	0	G	3070	AA	803	AA	803	269	0	0	0
ChrI.fa	3665610	59	21	G	13	CG	13	CG	46	0	13	46	0
ChrI.fa	3665611	43	21	T	258	CT	108	CT	108	0	28	0	15
ChrI.fa	3665614	33	21	C	20	CT	20	CT	53	0	25	0	8
ChrI.fa	3810377	527	1021	T	1808	AT	1123	AT	1123	303	0	0	224
ChrI.fa	3810436	700	818	T	3070	AT	67	AT	67	526	0	1	173
ChrI.fa	3827607	363	5	G	3070	AA	1086	AA	1086	363	0	0	0
ChrI.fa	3829376	278	0	G	3070	AA	833	AA	833	278	0	0	0
ChrI.fa	3871500	147	12	A	78	AC	78	AC	111	83	64	0	0
ChrI.fa	3992214	412	35	C	3070	AA	1206	AA	1206	409	2	0	1
ChrI.fa	4008893	399	1	C	3070	TT	1197	TT	1197	0	0	0	399
ChrI.fa	4064022	221	1	C	2665	TT	662	TT	662	0	0	0	221
ChrI.fa	4304169	42	13	G	109	AG	109	AG	142	17	0	25	0
ChrI.fa	4374343	93	21	G	38	AG	38	AG	71	23	0	70	0
ChrI.fa	4374344	85	21	G	455	AG	148	AG	148	56	0	29	0
ChrI.fa	4375421	109	0	A	1373	TT	325	TT	325	0	0	0	109
ChrI.fa	4407494	36	25	T	39	GT	39	GT	72	0	0	12	24
ChrI.fa	4407496	34	25	C	14	CG	14	CG	47	0	28	6	0
ChrI.fa	4431860	48	22	T	586	AA	139	AA	139	48	0	0	0
ChrI.fa	4431861	31	22	A	394	TT	90	TT	90	0	0	0	31
ChrI.fa	4431867	14	17	G	185	CC	39	CC	39	0	14	0	0
ChrI.fa	4431868	29	17	C	358	AA	84	AA	84	29	0	0	0
ChrI.fa	4442714	225	0	G	2693	AA	670	AA	670	225	0	0	0
ChrI.fa	4648160	110	22	G	767	TT	149	TT	149	1	0	14	95
ChrI.fa	4919603	159	0	A	1960	GG	476	GG	476	0	0	159	0
ChrI.fa	5142627	55	30	A	35	AG	35	AG	68	41	0	14	0
ChrI.fa	5142629	55	30	T	217	GT	185	GT	185	0	0	30	25
ChrI.fa	5142630	56	30	A	100	AT	100	AT	133	32	0	1	23
ChrI.fa	5271466	184	2	A	1912	TT	394	TT	394	12	0	0	172
ChrI.fa	5400080	326	0	C	3070	TT	976	TT	976	0	0	0	326
ChrI.fa	5456558	114	42	G	49	GT	49	GT	82	0	0	86	28

## Sheet: chr2
# ** CASAVA depth-filtered snp calls **
#$ CMDLINE /usr/local/libexec/CASAVA-1.8.0/filterSmallVariants.pl --projectDir=/data2/110630_SN187_0202_AB09BJABXX_Bernard_Lequere/Aligned/Project_gDNA_Bernard/Sample_LY1269/SNP --chrom=ChrII.fa
#$ SEQ_MAX_DEPTH ChrII.fa 804.760409718557
#
#$ COLUMNS seq_name pos bcalls_used bcalls_filt ref Q(snp) max_gt Q(max_gt) max_gt|poly_site Q(max_gt|poly_site) A_used C_used G_used T_used
ChrII.fa	36899	704	434	A	3070	GG	210	GG	210	153	1	548	2
ChrII.fa	37122	780	120	C	3070	TT	1637	TT	1637	1	50	0	729
ChrII.fa	37264	354	345	A	1159	AG	994	AG	994	163	0	191	0
ChrII.fa	128002	87	11	A	24	AT	24	AT	57	67	0	0	20
ChrII.fa	128008	85	12	A	228	AT	228	AT	261	47	0	0	38
ChrII.fa	128009	84	12	T	139	AT	139	AT	172	30	0	0	54
ChrII.fa	146080	61	32	C	112	CT	112	CT	145	0	36	0	25
ChrII.fa	153578	437	21	G	581	AG	581	AG	614	156	0	281	0
ChrII.fa	153579	440	21	C	674	CT	674	CT	707	0	274	1	165
ChrII.fa	153847	556	6	C	1495	CT	1495	CT	1528	0	288	0	268
ChrII.fa	153849	545	6	A	1379	AG	1379	AG	1412	285	0	258	2
ChrII.fa	153954	528	41	A	672	AT	672	AT	705	332	0	1	195
ChrII.fa	153964	448	64	T	90	AT	90	AT	123	120	0	0	328
ChrII.fa	153987	502	31	T	597	CT	597	CT	630	0	175	0	327
ChrII.fa	154044	610	32	G	910	AG	910	AG	943	229	1	380	0
ChrII.fa	154176	403	105	A	127	AT	127	AT	160	279	0	3	121
ChrII.fa	154443	582	43	T	959	CT	959	CT	992	0	229	0	353
ChrII.fa	154446	548	43	G	635	AG	635	AG	668	192	0	356	0
ChrII.fa	154603	531	0	A	1621	AC	1562	AC	1562	263	268	0	0
ChrII.fa	266718	257	4	A	3008	CC	735	CC	735	1	256	0	0
ChrII.fa	266780	304	4	T	3070	AA	910	AA	910	304	0	0	0
ChrII.fa	276539	294	2	A	3070	TT	874	TT	874	0	1	0	293
ChrII.fa	326703	106	15	C	28	CT	28	CT	61	1	58	0	47
ChrII.fa	603280	18	23	T	247	AA	51	AA	51	18	0	0	0
ChrII.fa	603282	5	18	A	80	TT	12	TT	12	0	0	0	5
ChrII.fa	603305	6	24	A	101	CC	15	CC	15	0	6	0	0
ChrII.fa	603306	19	24	C	272	AA	54	AA	54	19	0	0	0
ChrII.fa	685728	251	3	G	3032	AA	752	AA	752	251	0	0	0
ChrII.fa	699951	74	52	T	899	GG	220	GG	220	0	0	74	0
ChrII.fa	699952	75	52	G	889	TT	221	TT	221	0	0	0	75
ChrII.fa	699961	64	51	A	810	TT	185	TT	185	1	0	0	63
ChrII.fa	700011	30	10	A	363	CC	87	CC	87	0	30	0	0
ChrII.fa	700012	18	10	C	232	AA	51	AA	51	18	0	0	0
ChrII.fa	700024	10	4	T	148	AA	27	AA	27	10	0	0	0
ChrII.fa	700028	59	4	A	743	TT	175	TT	175	0	0	0	59
ChrII.fa	700113	195	0	A	2391	TT	584	TT	584	0	0	0	195
ChrII.fa	789443	63	17	C	13	AC	13	AC	45	18	45	0	0
ChrII.fa	820512	75	12	G	4	AG	4	AG	35	33	0	42	0
ChrII.fa	869806	241	9	G	2890	CC	720	CC	720	0	241	0	0
ChrII.fa	879033	336	1	T	3070	AA	1008	AA	1007	336	0	0	0
ChrII.fa	888600	70	22	C	26	AC	26	AC	59	17	53	0	0
ChrII.fa	888601	62	22	C	280	CG	185	CG	185	0	25	37	0
ChrII.fa	888602	60	22	G	196	AG	196	AG	229	29	0	31	0
ChrII.fa	903105	43	22	T	30	GT	30	GT	63	0	0	10	33
ChrII.fa	903106	43	23	G	161	GT	161	GT	194	0	0	22	21
ChrII.fa	903107	42	23	G	15	GT	15	GT	48	0	0	32	10
ChrII.fa	923543	223	0	C	2704	AA	664	AA	664	223	0	0	0
ChrII.fa	943554	299	2	C	3070	AA	897	AA	897	299	0	0	0
ChrII.fa	953201	269	0	A	3070	GG	804	GG	804	0	0	269	0
ChrII.fa	967094	188	32	A	2125	GG	543	GG	543	0	0	188	0
ChrII.fa	990639	365	2	C	3070	TT	1089	TT	1089	0	0	0	365
ChrII.fa	997702	8	0	C	90	AA	21	AA	21	8	0	0	0
ChrII.fa	997725	13	0	A	91	GG	24	GG	24	0	0	13	0
ChrII.fa	1155903	66	0	T	837	AA	194	AA	194	66	0	0	0
ChrII.fa	1159678	289	6	G	3070	CC	864	CC	864	0	289	0	0
ChrII.fa	1159694	302	6	A	3070	TT	904	TT	904	0	0	0	302
ChrII.fa	1208332	116	27	G	73	GT	73	GT	106	2	0	63	51
ChrII.fa	1238931	308	0	G	3070	AA	919	AA	919	308	0	0	0
ChrII.fa	1308619	84	12	T	59	GT	59	GT	92	0	0	25	59
ChrII.fa	1422317	279	1	T	3070	AA	836	AA	836	279	0	0	0
ChrII.fa	1553976	569	5	A	3070	TT	1707	TT	1707	0	0	0	569
ChrII.fa	1555935	407	2	C	1261	AC	1241	AC	1241	206	201	0	0
ChrII.fa	1620435	15	17	G	1	GG	8	AG	26	4	0	11	0
ChrII.fa	1672859	252	0	C	3005	TT	753	TT	753	0	0	0	252
ChrII.fa	1673002	194	2	G	2369	CC	581	CC	581	0	194	0	0
ChrII.fa	1678693	213	5	T	2398	AA	604	AA	604	210	0	1	2
ChrII.fa	1683324	392	2	T	3070	GG	1170	GG	1170	0	0	392	0
ChrII.fa	1697124	189	1	C	2179	TT	559	TT	559	0	0	0	189
ChrII.fa	1716272	52	11	C	285	CT	12	CT	12	1	11	0	40
ChrII.fa	1716273	50	11	T	29	CT	29	CT	62	0	14	0	36
ChrII.fa	1716288	95	41	G	1144	TT	283	TT	283	0	0	0	95
ChrII.fa	1716318	56	83	A	651	GG	148	GG	148	1	0	54	1
ChrII.fa	1716320	41	83	T	526	GG	120	GG	120	0	0	41	0
ChrII.fa	1716326	65	49	G	818	TT	191	TT	191	0	0	0	65
ChrII.fa	1748768	167	14	G	11	AG	11	AG	43	65	0	102	0
ChrII.fa	1784826	387	2	G	3070	AA	1157	AA	1157	387	0	0	0
ChrII.fa	1816763	2	0	T	45	CC	5	CC	5	0	2	0	0
ChrII.fa	1818233	216	59	T	106	AT	106	AT	139	63	0	0	153
ChrII.fa	1849777	280	0	G	3070	AA	830	AA	830	279	0	1	0
ChrII.fa	1865738	99	27	C	7	AC	7	AC	40	32	66	0	1
ChrII.fa	1873778	67	33	C	6	CT	6	CT	38	0	52	0	15
ChrII.fa	1873779	73	33	T	129	AT	129	AT	162	28	0	0	45
ChrII.fa	1873782	59	33	C	112	AC	112	AC	145	22	37	0	0
ChrII.fa	1941967	35	12	G	438	TT	100	TT	100	0	0	0	35
ChrII.fa	1941968	26	12	A	323	GG	73	GG	73	0	0	26	0
ChrII.fa	1941981	5	6	C	82	AA	12	AA	12	5	0	0	0
ChrII.fa	1941982	9	6	A	141	TT	24	TT	24	0	0	0	9
ChrII.fa	1950050	44	10	A	41	AG	41	AG	74	31	0	13	0
ChrII.fa	1950053	43	10	T	169	GT	169	GT	177	1	0	22	20
ChrII.fa	1960391	53	23	T	71	AT	71	AT	104	18	0	0	35
ChrII.fa	1960392	55	24	A	195	AG	195	AG	217	26	0	29	0
ChrII.fa	1960393	55	24	T	91	GT	91	GT	124	0	0	18	37
ChrII.fa	1962419	227	7	T	2690	AA	680	AA	680	227	0	0	0
ChrII.fa	1962439	252	11	A	3031	GG	755	GG	755	0	0	252	0
ChrII.fa	1962458	275	4	T	3070	AA	825	AA	825	275	0	0	0
ChrII.fa	1967452	1	0	A	1	AA	7	AC	3	0	1	0	0
ChrII.fa	1967474	1	0	T	6	CT	2	CT	3	0	1	0	0
ChrII.fa	1975467	357	2	C	3070	TT	1067	TT	1067	0	0	0	357
ChrII.fa	1987098	42	6	C	534	AA	123	AA	123	42	0	0	0
ChrII.fa	1987103	6	6	G	88	AA	15	AA	15	6	0	0	0
ChrII.fa	2007715	168	2	A	2050	GG	503	GG	503	0	0	168	0
ChrII.fa	2044929	188	0	A	2297	TT	563	TT	563	0	0	0	188
ChrII.fa	2049891	32	10	A	18	AG	18	AG	51	25	0	7	0
ChrII.fa	2049892	35	10	T	85	AT	85	AT	118	12	0	0	23
ChrII.fa	2049894	30	10	T	43	GT	43	GT	76	0	0	8	22
ChrII.fa	2053514	110	26	A	318	AG	318	AG	351	52	0	58	0
ChrII.fa	2053516	116	26	G	435	CG	266	CG	266	1	69	46	0
ChrII.fa	2108179	91	37	A	63	AT	63	AT	96	64	0	0	27
ChrII.fa	2108180	98	37	T	150	AT	150	AT	183	38	0	1	59
ChrII.fa	2108181	87	37	C	148	AC	148	AC	181	33	54	0	0
ChrII.fa	2148291	11	6	T	160	AA	30	AA	30	11	0	0	0
ChrII.fa	2148295	49	6	G	618	TT	142	TT	142	0	0	0	49
ChrII.fa	2187405	32	29	A	15	AG	15	AG	48	25	0	7	0
ChrII.fa	2187407	41	29	G	110	AG	110	AG	143	17	0	24	0
ChrII.fa	2187408	30	29	C	89	AC	89	AC	122	12	18	0	0
ChrII.fa	2187409	28	29	A	27	AC	27	AC	60	19	9	0	0
ChrII.fa	2228775	306	1	T	3070	GG	915	GG	915	0	0	306	0
ChrII.fa	2228777	302	1	G	3070	TT	906	TT	906	0	0	0	302
ChrII.fa	2347656	425	1	G	3070	AA	1273	AA	1273	425	0	0	0
ChrII.fa	2361266	75	39	G	61	GT	61	GT	94	0	0	41	34
ChrII.fa	2433932	696	545	A	3070	TT	135	TT	135	156	1	0	539
ChrII.fa	2436580	294	2	C	3070	GG	879	GG	879	0	0	294	0
ChrII.fa	2437855	642	4	A	437	AC	437	AC	470	432	210	0	0
ChrII.fa	2444543	265	1	T	3057	CC	744	CC	744	0	264	0	1
ChrII.fa	2676336	242	1	C	2900	TT	719	TT	719	0	0	0	242
ChrII.fa	2788933	49	41	C	142	CG	142	CG	175	0	27	22	0
ChrII.fa	2788934	48	41	A	197	AG	189	AG	190	24	0	24	0
ChrII.fa	2798041	63	24	T	231	CT	231	CT	245	0	33	0	30
ChrII.fa	2798042	73	24	T	96	GT	96	GT	129	0	0	23	50
ChrII.fa	2806053	593	2	G	3070	AA	1774	AA	1774	593	0	0	0
ChrII.fa	2811496	49	42	A	110	AC	110	AC	143	30	18	0	1
ChrII.fa	2811497	56	42	A	95	AT	95	AT	128	36	0	0	20
ChrII.fa	2811498	64	42	T	3	AT	3	AT	34	14	0	0	50
ChrII.fa	2901509	262	0	G	3070	TT	785	TT	785	0	0	0	262
ChrII.fa	2937523	182	17	T	1	TT	8	GT	25	1	1	68	112
ChrII.fa	3006137	388	2	A	3070	TT	1162	TT	1161	0	0	0	388
ChrII.fa	3058555	70	26	G	24	AG	24	AG	57	19	0	50	1
ChrII.fa	3590712	56	9	G	1	GG	5	GT	29	0	0	37	19
ChrII.fa	3619003	44	26	A	2	AA	4	AG	31	35	0	9	0
ChrII.fa	3619005	36	26	T	148	GT	148	GT	160	0	0	19	17
ChrII.fa	3619007	45	25	G	50	GT	50	GT	83	0	0	31	14
ChrII.fa	3860190	169	10	A	130	AC	130	AC	163	116	51	1	1
ChrII.fa	3959028	20	2	G	7	AG	7	AG	39	8	0	12	0
ChrII.fa	4019752	497	661	G	2225	AG	701	AG	701	321	0	176	0
ChrII.fa	4107660	46	9	G	16	AG	16	AG	48	25	3	18	0
ChrII.fa	4122326	313	2	T	3070	CC	939	CC	939	0	313	0	0
ChrII.fa	4144152	110	26	C	2	CC	4	CT	31	1	68	0	41
ChrII.fa	4254960	40	17	G	13	AG	13	AG	46	9	0	31	0
ChrII.fa	4254961	39	17	A	103	AG	103	AG	136	23	0	16	0
ChrII.fa	4254962	43	17	A	93	AT	93	AT	126	27	0	0	16
ChrII.fa	4254963	38	17	T	26	AT	26	AT	59	9	0	0	29
ChrII.fa	4357322	100	9	A	65	AC	65	AC	98	57	43	0	0
ChrII.fa	4400666	300	2	A	3070	CC	890	CC	890	0	299	0	1
ChrII.fa	4475069	3	0	T	6	GT	6	GT	24	0	0	2	1
ChrII.fa	4515621	21	9	C	27	AC	27	AC	60	11	10	0	0
ChrII.fa	4533394	758	3	T	2053	CT	2053	CT	2086	0	374	0	384
ChrII.fa	4533451	786	0	T	2029	CT	2029	CT	2062	2	375	0	409
ChrII.fa	4533636	399	2	C	831	CT	831	CT	864	0	231	0	168
ChrII.fa	4538038	8	110	A	103	GG	17	GG	17	0	0	8	0
ChrII.fa	4538048	616	170	C	3070	TT	804	TT	804	0	82	0	534
ChrII.fa	4538100	207	92	C	2363	TT	620	TT	620	0	0	0	207
ChrII.fa	4538102	17	88	G	225	AA	48	AA	48	17	0	0	0
ChrII.fa	4538126	45	160	C	521	GG	132	GG	132	0	0	45	0
ChrII.fa	4538128	169	161	A	1399	GT	213	GT	216	1	0	107	61
ChrII.fa	4538164	642	138	A	3070	TT	1903	TT	1903	1	0	0	641
ChrII.fa	4538173	50	126	A	591	TT	147	TT	147	0	0	0	50
ChrII.fa	4538330	1	153	A	4	AA	3	AT	3	0	0	0	1
ChrII.fa	4538335	419	202	A	3070	GG	513	GG	513	64	0	355	0
ChrII.fa	4538336	527	202	G	2512	AG	187	AG	187	366	1	159	1

## Sheet: chr3
# ** CASAVA depth-filtered snp calls **
#$ CMDLINE /usr/local/libexec/CASAVA-1.8.0/filterSmallVariants.pl --projectDir=/data2/110630_SN187_0202_AB09BJABXX_Bernard_Lequere/Aligned/Project_gDNA_Bernard/Sample_LY1269/SNP --chrom=ChrIII.fa
#$ SEQ_MAX_DEPTH ChrIII.fa 812.614109046018
#
#$ COLUMNS seq_name pos bcalls_used bcalls_filt ref Q(snp) max_gt Q(max_gt) max_gt|poly_site Q(max_gt|poly_site) A_used C_used G_used T_used
ChrIII.fa	33932	5	0	G	7	GT	7	GT	38	0	0	3	2
ChrIII.fa	115351	43	10	G	531	CC	126	CC	126	0	43	0	0
ChrIII.fa	115354	11	9	A	161	TT	30	TT	30	0	0	0	11
ChrIII.fa	117144	8	22	T	120	AA	21	AA	21	8	0	0	0
ChrIII.fa	117145	26	22	T	330	AA	75	AA	75	26	0	0	0
ChrIII.fa	140988	83	19	G	2	GG	5	AG	30	33	0	50	0
ChrIII.fa	227730	353	3	A	3070	TT	1058	TT	1058	0	0	0	353
ChrIII.fa	284657	230	0	C	2783	AA	685	AA	685	230	0	0	0
ChrIII.fa	595130	419	16	T	605	GT	605	GT	638	0	0	153	266
ChrIII.fa	595158	332	25	G	449	AG	449	AG	482	121	0	211	0
ChrIII.fa	595501	392	17	C	52	CT	52	CT	85	1	290	0	101
ChrIII.fa	595537	657	5	T	2155	CT	1674	CT	1674	0	352	0	305
ChrIII.fa	595547	639	6	G	2187	GT	1713	GT	1713	0	0	298	341
ChrIII.fa	595618	430	17	A	186	AG	186	AG	219	305	0	123	2
ChrIII.fa	595654	469	42	T	625	CT	625	CT	658	0	168	0	301
ChrIII.fa	595660	437	53	C	234	CT	234	CT	267	0	308	0	129
ChrIII.fa	595882	448	11	A	81	AG	81	AG	114	329	0	119	0
ChrIII.fa	595885	477	11	A	311	AG	311	AG	344	328	0	148	1
ChrIII.fa	595922	540	17	A	886	AG	886	AG	919	336	0	204	0
ChrIII.fa	719957	13	41	C	192	TT	36	TT	36	0	0	0	13
ChrIII.fa	719958	9	41	T	128	AA	24	AA	24	9	0	0	0
ChrIII.fa	719991	4	24	A	76	TT	10	TT	10	0	0	0	4
ChrIII.fa	720001	90	24	C	1109	TT	268	TT	268	0	0	0	90
ChrIII.fa	963343	331	3	A	3070	GG	940	GG	940	2	0	329	0
ChrIII.fa	1016310	62	19	A	18	AG	18	AG	51	47	0	15	0
ChrIII.fa	1016311	61	19	G	75	CG	75	CG	108	0	20	41	0
ChrIII.fa	1016313	61	19	T	117	CT	117	CT	150	0	21	0	40
ChrIII.fa	1097549	53	19	C	15	CT	15	CT	48	1	26	0	26
ChrIII.fa	1168328	252	0	T	3066	CC	755	CC	755	0	252	0	0
ChrIII.fa	1168363	141	33	G	1672	AA	410	AA	410	140	0	0	1
ChrIII.fa	1253274	66	13	T	29	CT	29	CT	62	0	39	2	25
ChrIII.fa	1281528	262	18	T	104	GT	104	GT	137	0	0	106	156
ChrIII.fa	1317802	247	1	C	2916	TT	736	TT	736	0	0	0	247
ChrIII.fa	1374938	346	1	A	3070	TT	1038	TT	1038	0	0	0	346
ChrIII.fa	1493950	347	3	A	575	AG	575	AG	608	213	1	132	1
ChrIII.fa	1494129	637	33	T	433	GT	433	GT	466	0	1	196	440
ChrIII.fa	1494164	419	14	A	343	AG	343	AG	376	284	0	135	0
ChrIII.fa	1494282	513	22	G	558	AG	558	AG	591	181	0	331	1
ChrIII.fa	1499389	284	21	C	123	CT	123	CT	156	1	205	0	78
ChrIII.fa	1499390	287	21	A	100	AT	100	AT	133	208	1	0	78
ChrIII.fa	1685486	61	21	A	1	AA	8	AG	26	49	0	12	0
ChrIII.fa	1685487	75	21	G	135	AG	135	AG	168	27	0	48	0
ChrIII.fa	1685492	91	20	C	3	CC	4	AC	32	20	71	0	0
ChrIII.fa	1756401	78	27	A	259	AT	240	AT	240	34	0	0	44
ChrIII.fa	1756402	91	27	A	104	AT	104	AT	137	63	0	0	28
ChrIII.fa	1756403	94	27	T	7	AT	7	AT	38	22	0	0	72
ChrIII.fa	1765401	412	1	G	3070	TT	1232	TT	1232	0	0	1	411
ChrIII.fa	1774235	43	13	T	52	CT	52	CT	85	0	11	0	32
ChrIII.fa	1774236	37	13	C	176	CG	148	CG	148	0	16	21	0
ChrIII.fa	1774237	32	13	T	22	AT	22	AT	55	8	0	0	24
ChrIII.fa	1792541	308	1	T	3070	CC	921	CC	921	0	308	0	0
ChrIII.fa	1793480	134	19	C	66	AC	66	AC	99	52	81	1	0
ChrIII.fa	1805838	4	0	A	1	AA	9	AT	24	3	0	0	1
ChrIII.fa	1862803	257	1	A	3070	GG	765	GG	765	0	1	256	0
ChrIII.fa	2381979	124	0	G	1557	TT	370	TT	370	0	0	0	124
