# Supplementary material for: A Genetic Screen for Functional Partners of Condensin in Fission Yeast
Source: G3 (Bethesda). 2013 Dec 20;4(2):373–81. doi: 10.1534/g3.113.009621 (PMC3931570; doi:10.1534/g3.113.009621)
Supplement: Supporting Information [file supp_g3.113.009621_FileS4.xlsx]

## Sheet: chr1
# ** CASAVA depth-filtered snp calls **
#$ CMDLINE /usr/local/libexec/CASAVA-1.8.0/filterSmallVariants.pl --projectDir=/data2/110630_SN187_0202_AB09BJABXX_Bernard_Lequere/Aligned/Project_gDNA_Bernard/Sample_LY904/SNP --chrom=ChrI.fa
#$ SEQ_MAX_DEPTH ChrI.fa 646.625399957304
#
#$ COLUMNS seq_name pos bcalls_used bcalls_filt ref Q(snp) max_gt Q(max_gt) max_gt|poly_site Q(max_gt|poly_site) A_used C_used G_used T_used
ChrI.fa	18475	284	1	C	792	CT	734	CT	734	0	137	1	146
ChrI.fa	180361	198	5	A	101	AC	101	AC	134	110	85	0	3
ChrI.fa	216551	66	12	T	15	CT	15	CT	48	0	25	0	41
ChrI.fa	309835	298	0	G	3070	TT	852	TT	852	0	0	1	297
ChrI.fa	470380	11	37	C	161	GG	30	GG	30	0	0	11	0
ChrI.fa	470381	8	37	G	93	TT	9	TT	9	0	0	1	7
ChrI.fa	470383	1	36	T	9	AT	2	AT	3	1	0	0	0
ChrI.fa	470389	11	29	A	155	GG	30	GG	30	0	0	11	0
ChrI.fa	470391	35	30	C	441	AA	99	AA	99	34	0	1	0
ChrI.fa	477739	250	1	T	2945	CC	739	CC	739	0	250	0	0
ChrI.fa	482739	24	15	T	169	GT	106	GT	106	0	0	16	8
ChrI.fa	482742	18	15	G	1	GG	10	GT	24	0	0	15	3
ChrI.fa	523603	341	0	G	3070	AA	1021	AA	1021	341	0	0	0
ChrI.fa	523883	140	0	G	1700	AA	414	AA	414	140	0	0	0
ChrI.fa	527156	310	2	C	3070	AA	929	AA	929	310	0	0	0
ChrI.fa	670032	65	28	C	27	AC	27	AC	60	16	49	0	0
ChrI.fa	670034	55	28	C	169	AC	169	AC	202	23	32	0	0
ChrI.fa	682994	50	16	C	21	CT	21	CT	54	0	36	0	14
ChrI.fa	682997	46	16	C	80	CG	80	CG	113	0	30	16	0
ChrI.fa	682998	42	16	G	1	GG	6	CG	29	0	9	33	0
ChrI.fa	759334	191	0	G	2297	TT	567	TT	567	0	0	0	191
ChrI.fa	862964	41	36	G	486	TT	116	TT	116	0	0	1	40
ChrI.fa	862965	39	36	A	83	AT	83	AT	116	24	0	0	15
ChrI.fa	987889	15	1	G	12	AG	12	AG	45	7	0	8	0
ChrI.fa	1260425	247	1	A	2854	TT	690	TT	690	2	0	1	244
ChrI.fa	1274803	105	18	T	367	AT	366	AT	376	53	0	0	52
ChrI.fa	1274805	102	18	T	63	AT	63	AT	96	28	0	0	74
ChrI.fa	1404744	254	2	T	2920	AA	719	AA	719	253	0	0	1
ChrI.fa	1424709	40	9	A	441	CT	136	CT	139	0	17	0	23
ChrI.fa	1664907	216	1	T	2635	AA	647	AA	647	216	0	0	0
ChrI.fa	1783458	128	0	C	1581	TT	382	TT	382	0	0	0	128
ChrI.fa	1936294	80	26	G	35	AG	35	AG	68	18	0	62	0
ChrI.fa	1936299	69	26	G	21	AG	21	AG	54	16	0	53	0
ChrI.fa	1999192	218	0	G	2627	CC	649	CC	649	0	218	0	0
ChrI.fa	2093954	251	3	A	3022	GG	750	GG	750	0	0	251	0
ChrI.fa	2104091	250	0	G	3037	TT	749	TT	749	0	0	0	250
ChrI.fa	2104097	253	0	C	3021	AA	756	AA	756	253	0	0	0
ChrI.fa	2154491	83	24	T	95	AT	95	AT	128	26	0	0	57
ChrI.fa	2154493	79	24	G	268	AG	266	AG	270	42	0	37	0
ChrI.fa	2154494	74	24	T	158	GT	158	GT	191	0	0	31	43
ChrI.fa	2236977	317	60	T	29	AT	29	AT	62	83	0	1	233
ChrI.fa	2288242	35	30	G	128	AG	128	AG	161	17	0	18	0
ChrI.fa	2288243	36	30	A	24	AT	24	AT	57	27	0	0	9
ChrI.fa	2421577	115	29	C	582	AC	183	AC	183	76	39	0	0
ChrI.fa	2506044	224	2	T	2711	AA	671	AA	671	224	0	0	0
ChrI.fa	2523704	144	6	A	13	AC	13	AC	46	91	52	0	1
ChrI.fa	2588020	118	13	A	257	AC	257	AC	290	69	49	0	0
ChrI.fa	2588021	125	13	C	420	AC	411	AC	412	65	59	1	0
ChrI.fa	2588073	128	10	T	445	AT	420	AT	420	67	0	0	61
ChrI.fa	2594263	46	21	C	122	CT	122	CT	155	0	28	0	18
ChrI.fa	2594265	71	21	A	26	AT	26	AT	59	53	0	0	18
ChrI.fa	2594327	20	7	C	256	AA	57	AA	57	20	0	0	0
ChrI.fa	2594328	19	7	A	243	CC	54	CC	54	0	19	0	0
ChrI.fa	2594350	3	14	A	51	TT	7	TT	7	0	0	0	3
ChrI.fa	2594351	9	14	T	140	AA	24	AA	24	9	0	0	0
ChrI.fa	2594394	66	6	C	184	CT	184	CT	217	0	36	0	30
ChrI.fa	2605764	342	9	T	3070	AA	1010	AA	1010	341	0	0	1
ChrI.fa	2605861	62	18	T	39	GT	39	GT	72	0	0	18	44
ChrI.fa	2605863	76	18	T	152	AT	152	AT	185	30	0	0	46
ChrI.fa	2605864	81	18	A	71	AC	71	AC	104	56	23	0	2
ChrI.fa	2607674	86	34	G	59	GT	59	GT	92	0	0	63	23
ChrI.fa	2747078	320	1	A	3070	GG	923	GG	920	0	0	318	2
ChrI.fa	2749094	88	27	C	25	CG	25	CG	58	0	54	33	1
ChrI.fa	2759871	63	18	T	204	CT	204	CT	237	0	31	0	32
ChrI.fa	2824260	155	0	C	1929	AA	463	AA	463	155	0	0	0
ChrI.fa	2874305	293	1	G	3070	AA	848	AA	845	291	0	0	2
ChrI.fa	2958950	126	16	A	401	AG	388	AG	388	57	0	69	0
ChrI.fa	2980533	246	1	G	2939	TT	733	TT	733	0	0	0	246
ChrI.fa	3038071	213	0	G	2471	AA	630	AA	629	212	0	0	1
ChrI.fa	3111508	169	2	A	2034	GG	500	GG	500	0	0	169	0
ChrI.fa	3115841	192	1	C	2235	AA	572	AA	572	192	0	0	0
ChrI.fa	3119299	332	0	G	3070	AA	990	AA	989	330	1	0	1
ChrI.fa	3125118	64	24	A	111	AT	111	AT	144	41	0	0	23
ChrI.fa	3125120	73	24	A	71	AT	71	AT	104	52	0	0	21
ChrI.fa	3178497	57	9	C	311	CT	133	CT	133	0	19	0	38
ChrI.fa	3179238	269	1	G	3070	CC	804	CC	804	0	269	0	0
ChrI.fa	3197528	54	10	A	10	AG	10	AG	43	43	0	11	0
ChrI.fa	3197531	51	12	T	305	GT	99	GT	99	0	0	35	16
ChrI.fa	3197534	35	13	G	71	GT	71	GT	104	0	0	22	13
ChrI.fa	3204845	146	1	G	1827	AA	436	AA	436	146	0	0	0
ChrI.fa	3289534	43	12	G	18	GT	18	GT	51	1	0	21	21
ChrI.fa	3358042	28	4	G	1	GG	7	CG	27	0	9	19	0
ChrI.fa	3397247	75	18	C	97	CT	97	CT	130	0	49	0	26
ChrI.fa	3397248	78	18	A	51	AC	51	AC	84	55	23	0	0
ChrI.fa	3450128	33	16	G	71	CG	71	CG	105	0	12	21	0
ChrI.fa	3450131	28	16	T	344	AG	108	AG	111	11	0	17	0
ChrI.fa	3460318	68	15	T	22	CT	22	CT	55	0	16	0	52
ChrI.fa	3460321	64	15	T	225	CT	225	CT	256	0	33	0	31
ChrI.fa	3460322	60	15	G	126	GT	126	GT	159	0	0	36	24
ChrI.fa	3538416	13	5	C	190	TT	33	TT	33	0	0	1	12
ChrI.fa	3538417	6	5	G	71	CC	15	CC	15	0	6	0	0
ChrI.fa	3538454	1	17	T	10	AT	3	AT	3	1	0	0	0
ChrI.fa	3538456	15	17	A	223	TT	40	TT	40	0	0	0	15
ChrI.fa	3548900	125	39	A	361	AT	361	AT	391	60	0	0	65
ChrI.fa	3548913	180	29	T	2181	AA	538	AA	538	180	0	0	0
ChrI.fa	3576756	263	0	T	1043	CT	596	CT	596	1	152	0	110
ChrI.fa	3583106	288	1	G	3070	AA	860	AA	860	288	0	0	0
ChrI.fa	3665610	13	6	G	8	CG	8	CG	40	0	2	11	0
ChrI.fa	3665611	16	6	T	68	CT	68	CT	101	0	8	0	8
ChrI.fa	3855791	35	10	T	128	GT	128	GT	156	0	0	16	19
ChrI.fa	3855792	36	10	T	72	AT	72	AT	105	12	0	0	24
ChrI.fa	3855793	37	10	A	1	AA	6	AG	28	30	0	7	0
ChrI.fa	3992214	298	37	C	3070	AA	822	AA	822	292	6	0	0
ChrI.fa	4208859	240	8	T	28	GT	28	GT	61	2	1	89	148
ChrI.fa	4304169	88	6	G	111	AG	111	AG	144	28	0	59	1
ChrI.fa	4304173	79	6	G	2	GG	4	AG	31	18	0	61	0
ChrI.fa	4374342	49	9	A	8	AT	8	AT	40	38	0	0	11
ChrI.fa	4374343	54	9	G	125	AG	125	AG	158	21	0	33	0
ChrI.fa	4374344	48	8	G	114	AG	114	AG	147	20	0	28	0
ChrI.fa	4375421	229	3	A	2807	TT	686	TT	686	0	0	0	229
ChrI.fa	4407494	22	11	T	51	GT	51	GT	84	0	0	8	14
ChrI.fa	4407496	15	11	C	6	CG	6	CG	38	0	13	2	0
ChrI.fa	4431860	25	7	T	305	AA	70	AA	70	25	0	0	0
ChrI.fa	4431861	19	7	A	243	TT	54	TT	54	0	0	0	19
ChrI.fa	4431867	7	15	G	112	CC	18	CC	18	0	7	0	0
ChrI.fa	4431868	22	15	C	284	AA	63	AA	63	22	0	0	0
ChrI.fa	4441486	31	21	C	5	CG	5	CG	36	0	22	9	0
ChrI.fa	4442714	276	0	G	3070	AA	828	AA	828	276	0	0	0
ChrI.fa	4648160	86	19	G	782	TT	189	TT	189	0	0	5	81
ChrI.fa	4919603	268	1	A	3070	GG	804	GG	804	0	0	268	0
ChrI.fa	5142627	38	20	A	65	AG	65	AG	98	26	0	12	0
ChrI.fa	5142629	47	20	T	130	GT	130	GT	163	0	0	20	27
ChrI.fa	5142630	48	20	A	79	AT	79	AT	112	30	0	0	18
ChrI.fa	5224616	118	35	C	133	CT	133	CT	166	0	79	0	39
ChrI.fa	5271466	194	6	A	1726	TT	278	TT	278	26	0	0	168
ChrI.fa	5400080	248	1	C	3031	TT	743	TT	743	0	0	0	248
ChrI.fa	5426636	183	31	C	393	CT	393	CT	426	0	98	0	85

## Sheet: chr2
# ** CASAVA depth-filtered snp calls **
#$ CMDLINE /usr/local/libexec/CASAVA-1.8.0/filterSmallVariants.pl --projectDir=/data2/110630_SN187_0202_AB09BJABXX_Bernard_Lequere/Aligned/Project_gDNA_Bernard/Sample_LY904/SNP --chrom=ChrII.fa
#$ SEQ_MAX_DEPTH ChrII.fa 659.452829586017
#
#$ COLUMNS seq_name pos bcalls_used bcalls_filt ref Q(snp) max_gt Q(max_gt) max_gt|poly_site Q(max_gt|poly_site) A_used C_used G_used T_used
ChrII.fa	128008	108	16	A	359	AT	359	AT	392	55	0	0	53
ChrII.fa	128009	107	16	T	292	AT	292	AT	325	47	0	0	60
ChrII.fa	146080	45	20	C	84	CT	84	CT	117	0	27	0	18
ChrII.fa	146087	58	20	C	1	CC	8	CT	25	0	44	0	14
ChrII.fa	153578	315	13	G	580	AG	580	AG	613	123	0	192	0
ChrII.fa	153579	330	13	C	623	CT	623	CT	656	0	198	0	132
ChrII.fa	153847	397	5	C	1592	CT	835	CT	835	0	165	0	232
ChrII.fa	153849	387	5	A	1490	AG	820	AG	820	164	0	223	0
ChrII.fa	153954	318	19	A	682	AT	682	AT	715	179	0	1	138
ChrII.fa	153964	257	33	T	293	AT	293	AT	326	87	0	0	170
ChrII.fa	153978	256	37	T	75	CT	75	CT	108	0	68	0	188
ChrII.fa	153987	315	21	T	595	CT	595	CT	628	0	123	2	190
ChrII.fa	154044	247	22	G	361	AG	361	AG	394	88	0	159	0
ChrII.fa	154176	211	41	A	76	AT	76	AT	109	146	0	7	58
ChrII.fa	154443	296	10	T	63	CT	63	CT	96	0	78	0	218
ChrII.fa	154560	241	8	C	45	CT	45	CT	78	0	179	0	62
ChrII.fa	154603	317	2	A	747	AC	747	AC	780	177	139	0	1
ChrII.fa	266718	206	1	A	2491	CC	614	CC	614	0	205	1	0
ChrII.fa	266780	196	1	T	2301	AA	583	AA	583	195	0	1	0
ChrII.fa	276539	141	1	A	1689	TT	419	TT	419	0	0	0	141
ChrII.fa	603280	42	43	T	523	AA	121	AA	121	42	0	0	0
ChrII.fa	603282	9	34	A	132	TT	24	TT	24	0	0	0	9
ChrII.fa	603305	13	22	A	183	CC	36	CC	36	0	13	0	0
ChrII.fa	603306	26	22	C	351	AA	75	AA	75	26	0	0	0
ChrII.fa	685728	231	3	G	2836	AA	692	AA	692	231	0	0	0
ChrII.fa	699951	119	65	T	1434	GG	353	GG	353	0	0	119	0
ChrII.fa	699952	121	65	G	1391	TT	323	TT	323	0	1	1	119
ChrII.fa	699961	89	62	A	1091	TT	265	TT	265	0	0	0	89
ChrII.fa	700011	24	8	A	315	CC	69	CC	69	0	24	0	0
ChrII.fa	700012	19	8	C	256	AA	54	AA	54	19	0	0	0
ChrII.fa	700024	6	8	T	101	AA	15	AA	15	6	0	0	0
ChrII.fa	700028	35	8	A	401	TT	74	TT	74	1	0	0	34
ChrII.fa	700113	318	1	A	3070	TT	951	TT	951	0	1	0	317
ChrII.fa	820512	50	3	G	22	AG	22	AG	55	23	0	27	0
ChrII.fa	869806	146	2	G	1798	CC	436	CC	436	0	146	0	0
ChrII.fa	879033	220	5	T	2643	AA	659	AA	659	220	0	0	0
ChrII.fa	888601	35	13	C	237	CG	63	CG	63	0	8	27	0
ChrII.fa	888602	29	13	G	152	AG	116	AG	116	18	0	11	0
ChrII.fa	903105	38	17	T	38	GT	38	GT	71	0	0	10	28
ChrII.fa	903106	44	17	G	176	GT	176	GT	184	0	0	21	23
ChrII.fa	923543	247	3	C	2992	AA	738	AA	738	247	0	0	0
ChrII.fa	943554	194	0	C	2361	AA	577	AA	577	194	0	0	0
ChrII.fa	953201	175	0	A	2126	GG	520	GG	520	0	0	175	0
ChrII.fa	967094	111	14	A	1303	GG	323	GG	323	0	0	111	0
ChrII.fa	1003025	201	0	A	2440	GG	601	GG	601	0	0	201	0
ChrII.fa	1155903	251	1	T	3070	AA	750	AA	750	251	0	0	0
ChrII.fa	1159678	214	8	G	2582	CC	641	CC	641	0	214	0	0
ChrII.fa	1159694	206	8	A	2447	TT	616	TT	616	0	0	0	206
ChrII.fa	1163155	58	24	T	361	AT	95	AT	95	41	0	0	17
ChrII.fa	1165288	229	15	A	24	AC	24	AC	57	135	94	0	0
ChrII.fa	1238931	292	1	G	3070	AA	876	AA	876	292	0	0	0
ChrII.fa	1265177	57	22	C	11	CG	11	CG	44	0	45	11	1
ChrII.fa	1265178	61	21	T	249	GT	237	GT	237	0	0	32	29
ChrII.fa	1308617	49	10	G	1	GG	9	AG	25	9	0	40	0
ChrII.fa	1308619	58	10	T	105	GT	105	GT	138	0	0	20	38
ChrII.fa	1422317	251	0	T	3054	AA	752	AA	752	251	0	0	0
ChrII.fa	1553976	391	3	A	3070	TT	1171	TT	1171	0	0	0	391
ChrII.fa	1555935	450	1	C	1571	AC	1196	AC	1196	243	206	1	0
ChrII.fa	1620412	21	19	T	2	TT	4	AT	31	10	0	0	11
ChrII.fa	1672859	171	0	C	2060	TT	509	TT	509	0	0	0	171
ChrII.fa	1673002	130	1	G	1624	CC	388	CC	388	0	130	0	0
ChrII.fa	1678693	174	3	T	1973	AA	508	AA	508	174	0	0	0
ChrII.fa	1683324	222	0	T	2651	GG	663	GG	663	0	0	222	0
ChrII.fa	1697124	346	0	C	3070	TT	1032	TT	1032	1	0	1	344
ChrII.fa	1716272	126	21	C	951	TT	166	TT	166	0	14	0	112
ChrII.fa	1716273	119	21	T	73	CT	73	CT	106	0	43	0	76
ChrII.fa	1716288	129	63	G	1562	TT	383	TT	383	0	0	0	129
ChrII.fa	1716318	55	116	A	679	GG	163	GG	163	0	0	55	0
ChrII.fa	1716320	41	115	T	528	GG	120	GG	120	0	0	41	0
ChrII.fa	1716326	82	72	G	1007	TT	242	TT	242	0	0	0	82
ChrII.fa	1747581	68	24	A	21	AT	21	AT	54	52	0	0	16
ChrII.fa	1784826	161	0	G	1960	AA	481	AA	481	161	0	0	0
ChrII.fa	1818225	144	48	T	8	CT	8	CT	41	0	34	0	110
ChrII.fa	1849777	201	1	G	2386	AA	599	AA	599	201	0	0	0
ChrII.fa	1873778	68	23	C	45	CT	45	CT	78	1	48	0	19
ChrII.fa	1873779	69	24	T	145	AT	145	AT	178	29	0	0	40
ChrII.fa	1873782	57	24	C	85	AC	85	AC	118	17	40	0	0
ChrII.fa	1941967	29	11	G	367	TT	84	TT	84	0	0	0	29
ChrII.fa	1941968	22	11	A	281	GG	63	GG	63	0	0	22	0
ChrII.fa	1941981	5	9	C	91	AA	12	AA	12	5	0	0	0
ChrII.fa	1941982	7	9	A	121	TT	18	TT	18	0	0	0	7
ChrII.fa	1948953	6	1	G	28	GT	28	GT	60	0	0	4	2
ChrII.fa	1948954	6	1	A	37	AG	37	AG	68	3	0	3	0
ChrII.fa	1950050	23	3	A	15	AG	15	AG	48	19	0	4	0
ChrII.fa	1950053	27	3	T	142	GT	141	GT	149	0	0	14	13
ChrII.fa	1950058	27	2	G	2	GG	4	GT	32	0	0	23	4
ChrII.fa	1960392	57	24	A	102	AG	102	AG	135	38	0	19	0
ChrII.fa	1960393	56	24	T	224	GT	192	GT	192	0	0	31	25
ChrII.fa	1960395	49	24	C	72	CT	72	CT	105	0	32	0	17
ChrII.fa	1962419	176	6	T	2092	AA	527	AA	527	176	0	0	0
ChrII.fa	1962439	138	6	A	1693	GG	412	GG	412	0	0	138	0
ChrII.fa	1962458	162	2	T	1935	AA	484	AA	484	162	0	0	0
ChrII.fa	1975467	161	3	C	1961	TT	479	TT	479	0	0	0	161
ChrII.fa	1987098	38	2	C	509	AA	111	AA	111	38	0	0	0
ChrII.fa	1987103	9	2	G	93	AA	24	AA	24	9	0	0	0
ChrII.fa	2007715	284	1	A	3070	GG	848	GG	848	0	0	284	0
ChrII.fa	2037700	270	33	G	30	GT	30	GT	63	0	0	191	79
ChrII.fa	2044929	289	0	A	3070	TT	867	TT	867	0	0	0	289
ChrII.fa	2049892	62	4	T	68	AT	68	AT	101	20	0	0	42
ChrII.fa	2049894	56	4	T	116	GT	116	GT	149	0	0	22	34
ChrII.fa	2049895	65	4	G	2	GG	5	AG	30	14	0	51	0
ChrII.fa	2147728	38	9	C	479	TT	109	TT	109	0	0	0	38
ChrII.fa	2147729	24	9	A	316	CC	67	CC	67	0	24	0	0
ChrII.fa	2148291	11	4	T	153	AA	30	AA	30	11	0	0	0
ChrII.fa	2148295	34	4	G	429	TT	99	TT	99	0	0	0	34
ChrII.fa	2187405	35	19	A	20	AG	20	AG	53	27	0	8	0
ChrII.fa	2187407	35	19	G	116	AG	116	AG	149	15	0	20	0
ChrII.fa	2187408	35	19	C	90	AC	90	AC	123	15	20	0	0
ChrII.fa	2187409	40	19	A	44	AC	44	AC	77	28	12	0	0
ChrII.fa	2200688	57	7	G	14	CG	14	CG	47	0	25	32	0
ChrII.fa	2228775	258	2	T	3038	GG	733	GG	733	1	0	256	1
ChrII.fa	2228777	260	2	G	3070	TT	779	TT	779	0	0	0	260
ChrII.fa	2268188	163	16	T	63	AT	63	AT	96	45	0	0	118
ChrII.fa	2293305	63	12	A	1	AA	9	AC	25	52	11	0	0
ChrII.fa	2297038	208	2	A	2537	GG	623	GG	623	0	0	208	0
ChrII.fa	2436580	180	2	C	2190	GG	537	GG	537	0	0	180	0
ChrII.fa	2437646	316	2	G	22	AG	22	AG	55	81	0	233	2
ChrII.fa	2437855	272	0	A	204	AC	204	AC	237	186	86	0	0
ChrII.fa	2444543	196	1	T	2271	CC	538	CC	538	0	195	0	1
ChrII.fa	2676336	203	1	C	2459	TT	606	TT	606	0	0	0	203
ChrII.fa	2713912	136	39	C	67	CT	67	CT	100	0	97	0	39
ChrII.fa	2788933	67	23	C	77	CG	77	CG	110	0	47	20	0
ChrII.fa	2788934	59	23	A	254	AG	200	AG	200	26	0	33	0
ChrII.fa	2806053	310	2	G	3070	AA	927	AA	927	310	0	0	0
ChrII.fa	2811496	39	26	A	154	AC	154	AC	185	20	19	0	0
ChrII.fa	2811497	44	26	A	103	AT	103	AT	136	28	0	0	16
ChrII.fa	2901509	247	0	G	2994	TT	740	TT	740	0	0	0	247
ChrII.fa	3006137	187	1	A	2232	TT	560	TT	560	0	0	0	187
ChrII.fa	3232035	349	0	T	3070	GG	1037	GG	1036	1	0	348	0
ChrII.fa	3302267	349	1	C	3070	TT	1023	TT	1020	1	0	2	346
ChrII.fa	3365536	4	0	G	1	GG	10	AG	23	1	0	3	0
ChrII.fa	3565460	207	2	G	2541	TT	620	TT	620	0	0	0	207
ChrII.fa	3580877	280	3	C	3070	TT	825	TT	825	0	1	0	279
ChrII.fa	3593834	281	2	T	3070	AA	840	AA	840	281	0	0	0
ChrII.fa	3650159	210	2	C	2551	TT	629	TT	629	0	0	0	210
ChrII.fa	3650361	197	1	C	2396	TT	590	TT	590	0	0	0	197
ChrII.fa	3656489	332	0	G	3070	AA	996	AA	996	332	0	0	0
ChrII.fa	3701614	249	1	C	2992	TT	744	TT	744	0	0	0	249
ChrII.fa	3766279	281	0	C	3070	TT	797	TT	797	0	1	0	280
ChrII.fa	3855965	255	2	C	2957	TT	751	TT	749	1	0	0	254
ChrII.fa	3860190	220	7	A	115	AC	115	AC	148	157	62	0	1
ChrII.fa	3959028	17	4	G	28	AG	28	AG	60	10	0	7	0
ChrII.fa	4036864	162	0	G	1941	AA	481	AA	481	161	0	0	1
ChrII.fa	4077391	131	13	A	48	AT	48	AT	81	96	0	0	35
ChrII.fa	4107660	31	7	G	1	GG	9	AG	25	12	0	19	0
ChrII.fa	4122326	215	0	T	2553	CC	603	CC	603	0	214	0	1
ChrII.fa	4400666	251	0	A	2965	CC	717	CC	714	1	248	0	2
ChrII.fa	4422120	23	2	C	282	TT	66	TT	66	0	0	0	23
ChrII.fa	4422123	9	2	T	117	CC	24	CC	24	0	9	0	0
ChrII.fa	4515621	59	15	C	56	AC	56	AC	89	30	29	0	0

## Sheet: chr3
# ** CASAVA depth-filtered snp calls **
#$ CMDLINE /usr/local/libexec/CASAVA-1.8.0/filterSmallVariants.pl --projectDir=/data2/110630_SN187_0202_AB09BJABXX_Bernard_Lequere/Aligned/Project_gDNA_Bernard/Sample_LY904/SNP --chrom=ChrIII.fa
#$ SEQ_MAX_DEPTH ChrIII.fa 640.984288854162
#
#$ COLUMNS seq_name pos bcalls_used bcalls_filt ref Q(snp) max_gt Q(max_gt) max_gt|poly_site Q(max_gt|poly_site) A_used C_used G_used T_used
ChrIII.fa	115351	37	27	G	487	CC	108	CC	108	0	37	0	0
ChrIII.fa	115354	11	27	A	156	TT	30	TT	30	0	0	0	11
ChrIII.fa	117144	14	17	T	188	AA	39	AA	39	14	0	0	0
ChrIII.fa	117145	17	17	T	222	AA	48	AA	48	17	0	0	0
ChrIII.fa	140988	42	14	G	38	AG	38	AG	71	23	0	19	0
ChrIII.fa	213059	259	22	T	117	GT	117	GT	150	1	0	120	138
ChrIII.fa	227730	149	0	A	1791	TT	443	TT	443	0	0	0	149
ChrIII.fa	247475	204	1	C	2452	TT	611	TT	611	0	0	0	204
ChrIII.fa	284657	254	0	C	3070	AA	761	AA	761	254	0	0	0
ChrIII.fa	342211	270	0	A	3070	GG	804	GG	804	0	0	269	1
ChrIII.fa	348545	61	5	G	2	GG	5	CG	30	0	18	43	0
ChrIII.fa	404198	140	0	T	1622	CC	370	CC	370	1	138	0	1
ChrIII.fa	406050	236	5	G	2806	AA	698	AA	698	235	0	0	1
ChrIII.fa	548122	149	2	G	1845	AA	445	AA	445	149	0	0	0
ChrIII.fa	595130	378	6	T	404	GT	404	GT	437	0	0	125	253
ChrIII.fa	595158	316	5	G	170	AG	170	AG	203	92	0	224	0
ChrIII.fa	595501	281	2	C	22	CT	22	CT	55	0	211	0	70
ChrIII.fa	595537	528	7	T	1197	CT	1197	CT	1230	0	236	0	292
ChrIII.fa	595547	500	6	G	1240	GT	1240	GT	1273	0	0	274	226
ChrIII.fa	595597	254	18	T	50	CT	50	CT	83	0	66	1	187
ChrIII.fa	595618	311	7	A	325	AG	325	AG	358	208	0	103	0
ChrIII.fa	595654	309	22	T	261	CT	261	CT	294	0	97	0	212
ChrIII.fa	595660	286	25	C	117	CT	117	CT	150	1	206	0	79
ChrIII.fa	595882	292	7	A	1	AA	6	AG	28	220	0	72	0
ChrIII.fa	595885	301	6	A	145	AG	145	AG	178	212	0	89	0
ChrIII.fa	595922	433	10	A	1086	AG	1086	AG	1119	239	0	194	0
ChrIII.fa	679772	217	1	T	2614	CC	648	CC	648	0	217	0	0
ChrIII.fa	719957	18	27	C	258	TT	51	TT	51	0	0	0	18
ChrIII.fa	719958	6	27	T	101	AA	15	AA	15	6	0	0	0
ChrIII.fa	719991	14	23	A	200	TT	39	TT	39	0	0	0	14
ChrIII.fa	720001	160	23	C	1916	TT	466	TT	466	0	1	0	159
ChrIII.fa	923633	234	0	G	2802	AA	697	AA	697	234	0	0	0
ChrIII.fa	925846	255	2	C	3070	TT	764	TT	764	0	0	0	255
ChrIII.fa	963343	155	2	A	1784	GG	463	GG	463	0	0	155	0
ChrIII.fa	1065801	9	0	G	3	GG	3	GT	33	0	0	7	2
ChrIII.fa	1097549	44	9	C	4	CT	4	CT	35	0	25	0	19
ChrIII.fa	1168328	328	3	T	3070	CC	982	CC	982	0	328	0	0
ChrIII.fa	1168363	216	44	G	2164	AA	475	AA	475	203	0	13	0
ChrIII.fa	1168405	90	13	T	81	AT	81	AT	114	29	0	0	61
ChrIII.fa	1168406	88	13	A	154	AT	154	AT	187	55	0	0	33
ChrIII.fa	1207793	237	1	G	2726	AA	695	AA	693	236	0	0	1
ChrIII.fa	1316383	192	1	G	2219	AA	542	AA	542	191	0	1	0
ChrIII.fa	1374938	186	1	A	2292	TT	557	TT	557	0	0	0	186
ChrIII.fa	1493950	115	2	A	247	AG	247	AG	280	69	0	45	1
ChrIII.fa	1494129	238	16	T	210	GT	210	GT	243	0	0	72	166
ChrIII.fa	1494164	184	8	A	29	AG	29	AG	62	140	0	44	0
ChrIII.fa	1494282	136	6	G	266	AG	266	AG	299	53	0	83	0
ChrIII.fa	1685486	45	14	A	59	AG	59	AG	92	31	0	14	0
ChrIII.fa	1685487	48	14	G	103	AG	103	AG	136	18	0	30	0
ChrIII.fa	1756401	75	30	A	93	AT	93	AT	126	48	0	0	27
ChrIII.fa	1756402	82	30	A	226	AT	226	AT	259	45	0	0	37
ChrIII.fa	1756403	83	30	T	142	AT	142	AT	175	31	0	0	52
ChrIII.fa	1765401	344	1	G	3070	TT	1026	TT	1025	0	1	0	343
ChrIII.fa	1774235	30	12	T	31	CT	31	CT	64	0	6	0	24
ChrIII.fa	1774236	32	12	C	170	CG	130	CG	130	0	12	20	0
ChrIII.fa	1774237	27	12	T	89	AT	89	AT	122	12	0	0	15
ChrIII.fa	1792541	295	2	T	3070	CC	882	CC	882	0	295	0	0
ChrIII.fa	1793480	135	25	C	7	AC	7	AC	40	45	89	1	0
ChrIII.fa	2127827	148	6	A	5	AC	5	AC	36	93	55	0	0
ChrIII.fa	2381979	287	0	G	3070	TT	856	TT	856	0	0	0	287
